1 **Genome-scale transcriptional regulatory network models for the mouse and human**  
2 **striatum predict roles for SMAD3 and other transcription factors in Huntington's disease**  
3

4 Seth A. Ament\* (1,7), Jocelynn R. Pearl\* (1, 2), Robert M. Bragg (3), Peter J. Skene (4), Sydney  
5 R. Coffey (3), Dani E. Bergey (1), Christopher L. Plaisier (1), Vanessa C. Wheeler (5), Marcy E.  
6 MacDonald (5), Nitin S. Baliga (1), Jim Rosinski (6), Leroy E. Hood (1), Jeffrey B. Carroll (3),  
7 and Nathan D. Price (1)#  
8

- 9 1. Institute for Systems Biology, Seattle, Washington  
10 2. Molecular & Cellular Biology Graduate Program, University of Washington, Seattle,  
11 Washington  
12 3. Behavioral Neuroscience Program, Department of Psychology, Western Washington  
13 University, Bellingham, Washington  
14 4. Basic Sciences Division, Fred Hutchinson Cancer Research Center, Seattle, Washington  
15 5. Molecular Neurogenetics Unit, Center for Human Genetic Research, Massachusetts  
16 General Hospital, Department of Neurology, Harvard Medical School, Boston,  
17 Massachusetts  
18 6. CHDI Management, CHDI Foundation, Princeton, New Jersey  
19 7. Institute for Genome Sciences and Department of Psychiatry, University of Maryland  
20 School of Medicine, Baltimore, MD  
21  
22

23 \*These authors contributed equally to this work.  
24

25 #To whom correspondence should be addressed: [nprice@systemsbiology.org](mailto:nprice@systemsbiology.org)  
26  
27  
28  
29  
30  
31  
32  
33  
34  
35  
36  
37  
38  
39  
40  
41  
42  
43  
44  
45  
46

1 **Abstract**

2  
3 Transcriptional changes occur presymptomatically and throughout Huntington's Disease (HD),  
4 motivating the study of transcriptional regulatory networks (TRNs) in HD. We reconstructed a  
5 genome-scale model for the target genes of 718 TFs in the mouse striatum by integrating a model  
6 of the genomic binding sites with transcriptome profiling of striatal tissue from HD mouse  
7 models. We identified 48 differentially expressed TF-target gene modules associated with age-  
8 and *Htt* allele-dependent gene expression changes in the mouse striatum, and replicated many of  
9 these associations in independent transcriptomic and proteomic datasets. Strikingly, many of  
10 these predicted target genes were also differentially expressed in striatal tissue from human  
11 disease. We experimentally validated a key model prediction that SMAD3 regulates HD-related  
12 gene expression changes using chromatin immunoprecipitation and deep sequencing (ChIP-seq)  
13 of mouse striatum. We found *Htt* allele-dependent changes in the genomic occupancy of  
14 SMAD3 and confirmed our model's prediction that many SMAD3 target genes are down-  
15 regulated early in HD. Importantly, our study provides a mouse and human striatal-specific TRN  
16 and prioritizes a hierarchy of transcription factor drivers in HD.  
17

## 1 Introduction

2  
3 Massive changes in gene expression accompany many human diseases, yet we still know  
4 relatively little about how specific transcription factors (TFs) mediate these changes.  
5 Comprehensive characterization of disease-related transcriptional regulatory networks (TRNs)  
6 can clarify potential disease mechanisms and prioritize targets for novel therapeutics. A variety  
7 of approaches have been developed to reconstruct interactions between TFs and their target  
8 genes, including models focused on reconstructing the physical locations of transcription factor  
9 binding (Neph *et al*, 2012; Gerstein *et al*, 2012), as well as computational algorithms utilizing  
10 gene co-expression to infer regulatory relationships (Marbach *et al*, 2012; Margolin *et al*, 2006;  
11 Bonneau *et al*, 2006; Friedman *et al*, 2000; Huynh-Thu *et al*, 2010; Reiss *et al*, 2015). These  
12 approaches have yielded insights into the regulation of a range of biological systems, yet  
13 accurate, genome-scale models of mammalian TRNs remain elusive.

14 Several lines of evidence point to a specific role for transcriptional regulatory changes in  
15 Huntington's disease (HD). HD is a fatal neurodegenerative disease caused by dominant  
16 inheritance of a polyglutamine (polyQ)-coding expanded trinucleotide (CAG) repeat in the *HTT*  
17 gene (MacDonald *et al*, 1993). Widespread transcriptional changes have been detected in post-  
18 mortem brain tissue from HD cases vs. controls (Hodges *et al*, 2006), and transcriptional changes  
19 are among the earliest detectable phenotypes in HD mouse models (Luthi-Carter *et al*, 2000;  
20 Seredenina & Luthi-Carter, 2012). These transcriptional changes are particularly prominent in  
21 the striatum, the most profoundly impacted brain region in HD (Tabrizi *et al*, 2013; Vonsattel *et*  
22 *al*, 1985). Replicable gene expression changes in the striatum of HD patients and HD mouse  
23 models include down-regulation of genes related to synaptic function in medium spiny neurons  
24 accompanied by up-regulation of genes related to neuroinflammation (Seredenina & Luthi-  
25 Carter, 2012).

26 Some of these transcriptional changes may be directly related to the functions of the HTT  
27 protein. Both wildtype and mutant HTT (mHTT) protein have been shown to associate with  
28 genomic DNA, and mHTT also interacts with histone modifying enzymes and is associated with  
29 changes in chromatin states (Thomas *et al*; Benn *et al*; Seong *et al*, 2010). Wildtype HTT protein  
30 has been shown to regulate the activity of some TFs (Zuccato *et al*, 2007). Also, high  
31 concentrations of nuclear mHTT aggregates sequester TF and co-factor proteins and interfere  
32 with genomic target finding, though it is unknown if this occurs at physiological concentrations  
33 of mHTT (Wheeler *et al*, 2000; Shirasaki *et al*, 2012; Li *et al*, 2016). Roles for several TFs in  
34 HD have been characterized (Huntingtin interacts with REST/NRSF to modulate the  
35 transcription of NRSE-controlled neuronal genes, 2003; Dickey *et al*, 2015; Arlotta *et al*, 2008;  
36 Tang *et al*, 2012), but we lack a global model for the relationships between HD-related changes  
37 in the activity of specific TFs and the downstream pathological processes that they regulate.

38 The availability of large transcriptomics datasets related to HD is now making it possible  
39 to begin comprehensive network analysis of the disease, particularly in mouse models.  
40 Langfelder *et al*. (Langfelder *et al*, 2016) generated RNA-seq from the striatum of 144 knock-in  
41 mice heterozygous for HD mutations and 64 wildtype littermate controls, and they used gene co-  
42 expression networks to identify modules of co-expressed genes with altered expression in HD.  
43 However, their analyses did not attempt to identify any of the TFs responsible for these gene  
44 expression changes.

45 Here, we investigated the roles of core TFs that are predicted to drive the gene expression  
46 changes in Huntington's disease, using a comprehensive network biology approach. We used a

1 machine learning strategy to reconstruct a genome-scale model for TF-target gene interactions in  
2 the mouse striatum, combining publicly available DNase-seq with brain transcriptomics data HD  
3 mouse models. We identified 48 core TFs whose predicted target genes were overrepresented  
4 among differentially expressed genes in at least five of fifteen conditions defined by a mouse's  
5 age and *Htt* allele, and we replicated the predicted core TFs and differential gene expression  
6 associations in multiple datasets from HD mouse models and from HD cases and controls. Based  
7 on the gene expression signature of SMAD3 and its predicted target genes, we hypothesized that  
8 SMAD3 is a core regulator of early gene expression changes in HD. Using chromatin  
9 immunoprecipitation and deep sequencing (ChIP-seq), we demonstrate *Htt*-allele-dependent  
10 changes in SMAD3 occupancy and down-regulation of SMAD3 target genes in mouse brain  
11 tissue. In conclusion, the results from our TRN analysis and ChIP-seq studies of HD reveal new  
12 insights into transcription factor drivers of complex gene expression changes in this  
13 neurodegenerative disease.

14

## 15 **Results**

16

### 17 **A genome-scale transcriptional regulatory network model of the mouse striatum.**

18

19 We reconstructed a model of TF-target gene interactions in the mouse striatum by  
20 integrating information about transcription factor binding sites (TFBSs) with evidence from gene  
21 co-expression in the mouse striatum (Fig. 1a).

22 We predicted the binding sites for 871 TFs in the mouse genome using digital genomic  
23 footprinting. We identified footprints in DNase-seq data from 23 mouse tissues (Yue *et al*,  
24 2014), using Wellington (Piper *et al*, 2013). Footprints are defined as short genomic regions with  
25 reduced accessibility to the DNase-I enzyme in at least one tissue. Our goal in combining  
26 DNase-seq data from multiple tissues was to reconstruct a single TFBS model that could make  
27 useful predictions about TF target genes, even in conditions for which DNase-seq data were not  
28 available. We identified 3,242,454 DNase-I footprints. Genomic footprints are often indicative of  
29 occupancy by a DNA-binding protein. We scanned these footprints for 2,547 sequence motifs  
30 from TRANSFAC (Matys *et al*, 2006), JASPAR (Mathelier *et al*, 2014), UniProbe (Hume *et al*,  
31 2015), and high-throughput SELEX (Jolma *et al*, 2013) to predict binding sites for specific TFs  
32 (TFBSs), and we compared these TFBSs to the locations of transcription start sites. We  
33 considered a TF to be a potential regulator of a gene if it had at least one binding site within 5kb  
34 of that gene's TSS. We showed previously that a 5kb region upstream and downstream of the  
35 TSS maximizes target gene prediction from digital genomic footprinting of the human genome  
36 (Plaisier *et al*, 2016).

37 To assess the accuracy of this TFBS model, we compared our TFBS predictions to ChIP-  
38 seq experiments from ENCODE (Yue *et al*, 2014) and ChEA (Lachmann *et al*, 2010) (SI Fig. 2).  
39 For 50 of 52 TFs, there was significant overlap between the sets of target genes predicted by our  
40 TFBS model vs. ChIP-seq (FDR < 1%). Our TFBS model had a median 78% recall of target  
41 genes identified by ChIP-seq, and a median 22% precision. That is, our model identified the  
42 majority of true-positive target genes but also made a large number of false-positive predictions.  
43 Low precision is expected in this model, since TFs typically occupy only a subset of their  
44 binding sites in a given tissue. Nonetheless, low precision indicates a need for additional filtering  
45 steps to identify target genes that are relevant in a specific context.

1 We sought to identify TF-target gene interactions that are active in the mouse striatum,  
2 by evaluating gene co-expression patterns in RNA-seq transcriptome profiles from the striatum  
3 of 208 mice (Langfelder *et al*, 2016). The general idea is that active regulation of a target gene  
4 by a TF is likely to be associated with strong TF-gene co-expression, and TFBSs allow us to  
5 identify direct regulatory interactions. This step also removes TFs with low expression: of the  
6 871 TFs with TFBS predictions we retained as potential regulators the 718 TFs that were  
7 expressed in the striatum. We fit a regression model to predict the expression of each gene based  
8 on the combined expression patterns of TFs with one or more TFBSs  $\pm 5$ kb of that gene's  
9 transcription start site. We used LASSO regularization to select the subset of TFs whose  
10 expression patterns together predicted the expression of the target gene. This approach extends  
11 several previous regression methods for TRN reconstruction (Friedman *et al*, 2010; Tibshirani,  
12 1996; Bonneau *et al*, 2006; Haury *et al*, 2012) by introducing TFBS-based constraints. In  
13 preliminary work, we considered a range of LASSO and elastic net ( $\alpha = 0.2, 0.4, 0.6, 0.8,$   
14  $1.0$ ) regularization penalties and evaluated performance in five-fold cross-validation (see  
15 Methods). We selected LASSO based on the highest correlation between prediction accuracy in  
16 training vs. test sets.

17 We validated the predictive accuracy of our TRN model by comparing predicted vs.  
18 observed expression levels of each gene. Our model explained  $>50\%$  of expression variation for  
19 13,009 genes in training data (Fig. 1b). Prediction accuracy in five-fold cross-validation was  
20 nearly identical to prediction accuracy in training data. That is, genes whose expression was  
21 accurately predicted in the training data were also accurately predicted in the test sets ( $r=0.94$ ;  
22 Fig. 1b). Genes whose expression was not accurately predicted generally had low expression in  
23 the striatum (Supplementary Information [SI] Fig. 1). We removed poorly predicted genes, based  
24 on their training set accuracy before moving to the test set. The final TRN model contains 13,009  
25 target genes regulated by 718 TFs via 176,518 interactions (SI Dataset 1). Our model predicts a  
26 median of 14 TFs regulating each target gene and a median of 147 target genes per TF (Fig.  
27 1c,d). 15 TFs were predicted to regulate  $>1,000$  target genes (SI Figure 3). Importantly, TF-  
28 target gene interactions retained in our striatum-specific TRN model were enriched for genomic  
29 footprints in the adult ( $p = 1.4e-82$ ) and fetal ( $p = 2.1e-88$ ) brain, supporting the idea that these  
30 TF-target gene interactions reflect TF binding sites in the brain.

31 We defined as "TF-target gene modules" the sets of genes predicted to be direct targets of  
32 each of the 718 TFs. 135 of these 718 TF-target gene modules were enriched for a functional  
33 category from Gene Ontology (Ashburner *et al*, 2000) ( $FDR < 5\%$ , adjusting for 4,624 GO  
34 terms). 337 of the 718 TF modules were enriched ( $p < 0.01$ ) for genes expressed specifically in a  
35 major neuronal or non-neuronal striatal cell type (Doyle *et al*, 2008; Zhang *et al*, 2014;  
36 Dougherty *et al*, 2010), including known cell type-specific activities for both neuronal (e.g.,  
37 *Npas1-3*) and glia-specific TFs (e.g., *Olig1*, *Olig2*) (SI Fig. 4). These results suggest that many  
38 TRN modules reflect the activities of TFs on biological processes within specific cell types.

39

#### 40 **Prediction of core TFs associated with transcriptional changes in HD mouse models.**

41

42 We next sought to identify TFs that are core regulators of transcriptional changes in HD.  
43 Of the 208 mice in the RNA-seq dataset used for network reconstruction, 144 were heterozygous  
44 for a human *HTT* allele knocked into the endogenous *Htt* locus (Wheeler *et al*, 1999), and the  
45 remaining 64 mice were C57BL/6J littermate controls. Six distinct *HTT* alleles differing in the  
46 length of the poly-Q repeat were knocked in. In humans, the shortest of these alleles -- *Htt*<sup>Q20</sup> -- is

1 non-pathogenic, and the remaining alleles -- *Htt*<sup>Q80</sup>, *Htt*<sup>Q92</sup>, *Htt*<sup>Q111</sup>, *Htt*<sup>Q140</sup>, and *Htt*<sup>Q175</sup> -- are  
2 associated with progressively earlier onset of symptoms. We used RNA-seq data from four male  
3 and four female mice of each genotype at each of three time points: 2-months-old, 6-months-old,  
4 and 10-months-old. These mouse models undergo subtle age- and allele-dependent changes in  
5 behavior, and all of the ages profiled precede detectable neuronal cell death (Alexandrov *et al*,  
6 2016; Rothe *et al*, 2015; Carty *et al*, 2015).

7 We evaluated gene expression differences between *Htt*<sup>Q20/+</sup> mice and mice with each of  
8 the five pathogenic *HTT* alleles at each time point, a total of 15 comparisons. The extent of gene  
9 expression changes increased in an age- and Q-length-dependent fashion, with extensive overlap  
10 between the DEGs identified in each condition (Fig. 2). 8,985 genes showed some evidence of  
11 differential expression (DEGs;  $p < 0.01$ ) in at least one of the 15 conditions, of which 5,132 were  
12 significant at a stringent False Discovery Rate  $< 1\%$ . These results suggest that robust and  
13 replicable gene expression changes occur in the striatum of these HD mouse models at ages well  
14 before the onset of neuronal cell death or other overt pathology.

15 The predicted target genes of 209 TFs were overrepresented for DEGs in at least one of  
16 the 15 conditions (3 ages x 5 mouse models; Fisher's exact test,  $p < 1e-6$ ; SI Dataset 2).  
17 Repeating this analysis in 1,000 permuted data sets indicated that enrichments at this level of  
18 significance never occurred in more than four conditions. We therefore focused on a core set of  
19 48 TFs whose predicted target genes were overrepresented for DEGs in five or more conditions.  
20 Notably, 44 of these 48 TFs were differentially expressed (FDR  $< 0.01$ ) in at least one of the 15  
21 conditions (SI Fig. 4). We refer to these 48 TFs as core TFs.

## 22 **Replication of core TFs in independent datasets.**

23  
24  
25 We sought to replicate these associations by testing for enrichment of TF-target gene  
26 modules for differentially expressed genes in independent HD-related datasets. First, we  
27 conducted a meta-analysis of differentially expressed TF-target gene modules in four  
28 independent microarray gene expression profiling studies of striatal tissue from HD mouse  
29 models (Becanovic *et al*, 2010; Giles *et al*, 2012; Fossale *et al*, 2011; Kuhn *et al*, 2007). Targets  
30 of 46 of the 48 core TFs were enriched for DEGs (meta-analysis  $p$ -value  $< 0.01$ ) in the  
31 microarray data. The overlap between TFs whose target genes were differentially expressed in  
32 HD vs. control mice in microarray datasets and the core TFs from our primary dataset was  
33 significantly greater than expected by chance (Fisher's exact test:  $p = 5.7e-32$ ). These results  
34 suggest that transcriptional changes in most of the core TF-target gene modules were preserved  
35 across multiple datasets and mouse models of HD.

36 Next, we asked whether the target genes of core TFs were also differentially abundant at  
37 the protein level. We studied quantitative proteomics data from the striatum of 64 6-month-old  
38 HD knock-in mice (Langfelder *et al*, 2016). These were a subset of the mice profiled with RNA-  
39 seq in our primary dataset. Targets of 22 of the 48 core TFs were enriched for differentially  
40 abundant proteins (Fisher's exact test,  $p < 0.01$ ). The overlap between TFs whose target genes  
41 were differentially abundant between HD vs. wildtype mice and the core regulator TFs was  
42 significantly greater than expected by chance (Fisher's exact test:  $p = 5.7e-20$ ).

43 Third, we asked whether target genes of these same TFs are differentially expressed in  
44 late-stage human disease. We reconstructed a TRN model for the human striatum integrating a  
45 map of TFBSs (Plaisier *et al*, 2016) based on digital genomic footprinting of 41 human cell  
46 types (Neph *et al*, 2012) with microarray gene expression profiles of post-mortem striatal tissue



1 from 36 HD cases and 30 controls (Hodges *et al*, 2006). As in our TRN model for the mouse  
2 striatum, we fit a LASSO regression model to predict the expression of each gene in human  
3 striatum from the expression levels of TFs with predicted TFBSs within 5kb of its transcription  
4 start sites (SI Fig. 6). We studied the enrichments of TF-target gene modules from this human  
5 striatum TRN model for differentially expressed genes

6 We compared HD-related TF-target gene modules identified in mouse and human  
7 striatum, focusing on 616 TFs with one-to-one orthology and  $\geq 10$  predicted target genes in both  
8 the mouse and human striatum TRN models. We conducted a meta-analysis of two independent  
9 datasets from the dorsal striatum of HD cases vs. controls (Hodges *et al*, 2006; Durrenberger *et al*,  
10 2015) to identify TF-target gene modules enriched for DEGs. Targets of 13 of the 48 core  
11 TFs from mouse striatum were over-represented among differentially expressed genes in HD  
12 cases vs. controls. This overlap was not statistically greater than expected by chance (odds ratio  
13 = 1.79;  $p = 0.05$ ). However, when we considered the broader set of 209 TF-target gene modules  
14 that were enriched for differentially expressed genes in any of the 15 conditions from the  
15 primary RNA-seq dataset, we found significant overlap for TF-target gene modules that were  
16 down-regulated both in HD and in HD mouse models (28 shared TF-target gene modules; odds  
17 ratio = 3.6,  $p = 5.0e-5$ ; SI Fig. 6d) and for TF-target gene modules that were up-regulated both in  
18 HD and in HD mouse models (26 shared TF-target gene modules; odds ratio = 1.8,  $p = 0.02$ ; SI  
19 Fig. 6e). The striatum is heavily degraded in late-stage HD, with many dead neurons and  
20 extensive astrogliosis. Nonetheless, these results suggest that some transcriptional programs are  
21 shared between the earliest stages of molecular progression (assayed in mouse models) and late  
22 stages of human disease.

23 Notably, targets of 13 of the 48 core regulator TFs were enriched for differentially  
24 expressed genes in all four datasets: *Gli3*, *Irf2*, *Klf16*, *Npas2*, *Pax6*, *Rarb*, *Rfx2*, *Rxrg*, *Smad3*,  
25 *Tcf12*, *Tef*, *Ubp1*, and *Vezf1*. These 13 TFs may be especially interesting for follow-up studies.

26

## 27 **Biological associations of core TFs.**

28

29 We evaluated relationships among the 48 core TFs based on clustering and network  
30 topology. Plotting TF-to-TF regulatory interactions among the 48 core TFs (Fig. 4) revealed two  
31 distinct TF-to-TF sub-networks, characterized by numerous positive interactions within sub-  
32 networks and by fewer, mostly inhibitory interactions between sub-networks. The target genes of  
33 TFs in the first sub-network were predominantly down-regulated in HD, while the target genes  
34 of TFs in the second module were predominantly up-regulated. Hierarchical clustering of the 48  
35 core TFs based on the expression patterns of their predicted target genes revealed similar  
36 groupings of TFs whose target genes were predominantly down- vs. up-regulated (Fig. 5).

37 We studied the predicted target genes of each core TF to characterize possible roles for  
38 these TFs in HD. Down-regulated TF-target gene modules were overrepresented for genes  
39 specifically expressed in *Drd1+* and *Drd2+* medium spiny neurons (Fig. 5). Functional  
40 enrichments within these modules were mostly related to synaptic function, including metal ion  
41 transmembrane transporters (targets of *Npas2*,  $p = 2.3e-4$ ), voltage-gated ion channels (targets of  
42 *Mafa*,  $p = 8.1e-4$ ), and protein localization to cell surface (targets of *Rxrg*,  $p = 1.7e-4$ ). These  
43 network changes may be linked to synapse loss in medium spiny neurons, which is known to  
44 occur in knock-in mouse models of HD (Deng *et al*, 2013).

45 Some up-regulated TF-target gene modules were overrepresented for genes specifically  
46 expressed in oligodendrocytes or astrocytes, while others were overrepresented for genes

1 specifically expressed in neurons (Fig. 5). Functional enrichments within these modules included  
2 Gene Ontology terms related to apoptosis (“positive regulation of extrinsic apoptotic signaling  
3 pathway via death domain receptors”, targets of *Wt1*,  $p = 1.8e-4$ ) and DNA repair (targets of  
4 *Runx2*, “single-strand selective uracil DNA N-glycosylase activity”,  $p = 2.0e-4$ ). Therefore, core  
5 TFs whose target genes were predominantly up-regulated may contribute to a variety of  
6 pathological processes both in neurons and in glia. The number of oligodendrocytes is basally  
7 increased in HD mutation carriers, while activated gliosis is thought to begin later in  
8 disease progression (Vonsattel *et al*, 1985).

9 An open question in the field is whether the same sequence of pathogenic events  
10 underlies disease progression in juvenile-onset HD due to *HTT* alleles with very long poly-Q  
11 tracts vs. adult-onset HD due to *HTT* alleles with relatively short poly-Q tracts. This question is  
12 of practical relevance for modeling HD in mice, since mouse models with very long *HTT* alleles  
13 are often used in research due to their faster rates of phenotypic progression within a two-year  
14 lifespan. To address this question, we evaluated overlap between TF-target gene modules  
15 activated at the earliest time points in mice with each of the five pathogenic *Htt* alleles in our  
16 dataset. In the mice with the longest *HTT* alleles -- *Htt*<sup>Q175</sup> and *Htt*<sup>Q140</sup> -- the target genes of core  
17 TFs first became enriched for differentially expressed genes in two-month-old mice. In mice  
18 with relatively short *HTT* alleles -- *Htt*<sup>Q111</sup>, *Htt*<sup>Q92</sup> and *Htt*<sup>Q80</sup> -- target genes of core TFs became  
19 enriched for differentially expressed genes beginning in six-month-old mice. We found that eight  
20 modules -- the predicted target genes of IRF2, MAFA, KLF16, LMO2, NPAS2, RUNX2, RXRG,  
21 and VEZF1 -- were significantly enriched for DEGs in at least three of these five conditions  
22 (two-month-old *Htt*<sup>Q175/+</sup>, two-month-old *Htt*<sup>Q140/+</sup>, six-month-old *Htt*<sup>Q111/+</sup>, six-month-old *Htt*<sup>Q92/+</sup>,  
23 and six-month-old *Htt*<sup>Q80/+</sup>). A limitation of this analysis is that all of the alleles used in this study  
24 are associated with juvenile onset disease, and the extent to which these results extend to adult-  
25 onset alleles remains to be determined. Nonetheless, these results suggest that many aspects of the  
26 trajectory of transcriptional changes are shared across the *HTT* Q-lengths that have been studied.  
27 Notably, all of the TFs whose target genes were enriched for differentially expressed genes at the  
28 very earliest timepoints were enriched primarily for genes that were down-regulated in HD.  
29 Strong enrichments of TF-target gene modules for up-regulated genes occurred only at slightly  
30 later time points.

### 31 32 **Genome-wide characterization of SMAD3 binding sites in the mouse striatum supports a** 33 **role in early gene dysregulation in HD.**

34  
35 SMAD3 was one of 13 core TFs whose predicted target genes were overrepresented  
36 among differentially expressed genes across all four independent datasets. Progressive down-  
37 regulation of *Smad3* mRNA (Fig. 6a) and of predicted SMAD3 target genes (Fig. 5) occurred in  
38 an age- and *Htt*-allele-dependent fashion, beginning at or before six postnatal months.

39 We characterized the binding sites of SMAD3 in the striatum of four-month-old *Htt*<sup>Q111/+</sup>  
40 mice and wild-type littermate controls by chromatin immunoprecipitation and deep sequencing  
41 (ChIP-seq,  $n=2$  pooled samples per group, with each pool containing DNA from three mice).  
42 Peak-calling revealed 57,772 SMAD3 peaks (MACS2.1, FDR < 0.01 and >10 reads in at least  
43 two of the four samples; Dataset 3). 34,633 of the 57,772 SMAD3 peaks (59.9%) were located  
44 within 10kb of transcription start sites (TSSs), including at least one peak within 10kb of the  
45 TSSs for 11,727 genes (Fig. 6b). The summits of SMAD3 peaks were enriched for the  
46 SMAD2:SMAD3:SMAD4 motif ( $p$ -value =  $7.2e-85$ ; Fig. 6c). Importantly, the TSSs for 753 of



1 the 938 computationally predicted SMAD3 target genes in our TRN model were located within  
2 10kb of at least one ChIP-based SMAD3 binding site. This overlap was significantly greater than  
3 expected by chance (odds ratio = 4.33, p-value = 2.8e-84).

4 We characterized the relationship between SMAD3 occupancy and transcriptional  
5 activation by measuring the genomic occupancy of RNA Polymerase II (RNAPII) in the striatum  
6 of *Htt<sup>Q111/+</sup>* and wildtype mice. RNAPII occupancy is a marker of active transcription and of  
7 active transcription start sites. Occupancy of SMAD3 and of RNAPII were positively correlated,  
8 across all genomic regions ( $r = 0.70$ ) and specifically within SMAD3 peaks ( $r = 0.71$ ).

9 Similarly, we characterized the relationship between SMAD3 occupancy and chromatin  
10 accessibility, using publicly available DNase-seq of midbrain tissue from wildtype mice. 22,650  
11 of the 57,772 SMAD3 peaks (39.2%) overlapped a DNase hypersensitive site in the midbrain.  
12 Occupancy of SMAD3 was positively correlated with DNase-I hypersensitivity across all  
13 genomic regions ( $r = 0.33$ ) and specifically within SMAD3 peaks ( $r = 0.25$ ).

14 We ranked genes from highest to lowest SMAD3 regulatory potential based on the  
15 number of SMAD3 peaks within 10kb of their transcriptional start sites. We focused on the top  
16 837 genes with SMAD3 peak counts > 2 standard deviations above the mean. These top 837  
17 SMAD3 target genes were enriched (FDR < 0.01) for 24 non-overlapping clusters of Gene  
18 Ontology terms (SI Table 1). These enriched GO terms prominently featured pathways related to  
19 gene regulation (“mRNA processing”,  $p = 4.2e-9$ ; “histone modification”,  $p = 1.7e-7$ ;  
20 “transcriptional repressor complex”,  $p = 3.7e-5$ ), as well as functions more specifically related to  
21 brain function (“neuromuscular process controlling balance”,  $p = 1.2e-7$ ; “brain development”,  $p$   
22  $= 1.27e-6$ ; “neuronal cell body”,  $p = 2.5e-5$ ).

23 We performed quantitative and qualitative analyses to compare SMAD3 occupancy in  
24 *Htt<sup>Q111/+</sup>* vs. wildtype mice. 51,721 of the 57,772 SMAD3 peaks (89.5%) were identified in both  
25 *Htt<sup>Q111/+</sup>* and wildtype mice. 5,419 peaks (9.4%) were identified only in wildtype mice, while  
26 only 632 peaks (1.1%) were identified only in *Htt<sup>Q111/+</sup>* mice (Fig. 6d). Quantitative analyses of  
27 differential binding with edgeR revealed four peaks whose occupancy was significantly different  
28 (FDR < 0.05) between *Htt<sup>Q111/+</sup>* and wildtype mice. All four of these peaks were more weakly  
29 occupied in *Htt<sup>Q111/+</sup>* mice. 138 peaks had nominally significant differences in occupancy  
30 between genotypes ( $p < 0.01$ ). 133 of these 138 peaks (96.4%) were more weakly occupied in  
31 *Htt<sup>Q111/+</sup>* mice (Fig. 6e). These results suggest that SMAD3 occupancy is decreased at a subset of  
32 its binding sites in four-month-old *Htt<sup>Q111/+</sup>* mice.

33 Finally, we tested whether the top 837 SMAD3 target genes from ChIP-seq were  
34 differentially expressed in HD knock-in mice. The top 837 SMAD3 target genes from ChIP-seq  
35 were significantly overrepresented among genes that became down-regulated in the striatum of  
36 HD knock-in mice (223 down-regulated SMAD3 target genes; odds ratio = 2.0, p-value = 3.4e-  
37 15; Fig. 6f). By contrast, SMAD3 target genes were not overrepresented among genes that  
38 became up-regulated in the striatum of HD mouse models (143 up-regulated SMAD3 target  
39 genes, odds ratio = 0.92,  $p = 0.40$ ). These results are consistent with our computational model, in  
40 which SMAD3 target genes were primarily down-regulated in HD knock-in mice. Therefore,  
41 SMAD3 binding is associated with down regulation in HD mouse models.

## 42 Discussion

43 Here, we identified putative core TFs regulating gene expression changes in Huntington’s  
44 disease by reconstructing genome-scale transcriptional regulatory network models for the mouse  
45  
46

1 and human striatum. Identifying core TFs in HD provides insights into the mechanisms of this  
2 devastating, incurable disease. This method to reconstruct models of mammalian transcriptional  
3 regulatory networks can be readily applied to find regulators underlying any trait of interest.

4 Our model extends prior knowledge about the TFs involved in HD. A role in HD for  
5 *Rarb* is supported by ChIP-seq and transcriptome profiling of striatal tissue from *Rarb*<sup>-/-</sup> mice  
6 (Niewiadomska-Cimicka *et al*, 2016). A role in HD for *Foxo1* is supported by experimental  
7 evidence that FOXO signaling influences the vulnerability of striatal neurons to mutant Htt  
8 (Parker *et al*, 2012). A role in HD for *Relb* is supported by experimental evidence that NF-kB  
9 signaling mediates aberrant neuroinflammatory responses in HD and HD mouse models (Hsiao  
10 *et al*, 2013). Notably, microglia counts in 10-12 month *Htt*<sup>Q111/+</sup> mice indicate that these cells  
11 are not proliferating, suggesting that the transcriptional changes observed in our study  
12 represent a proinflammatory state, rather than microgliosis *per se*. Other predicted core TFs,  
13 including *Klf16* and *Rxrg*, have previously been noted among the most consistently differentially  
14 expressed genes in mouse models of HD (Seredenina & Luthi-Carter, 2012). In some cases,  
15 known functions for core TFs suggest hypotheses about their roles in HD. For instance, *Npas2* is  
16 a component of the molecular clock, so its dysfunction could contribute to circadian disturbances  
17 in HD (Morton *et al*, 2005). Notably, the predicted target genes for several TFs whose functions  
18 in HD have been studied by other investigators -- e.g., *Rest* (Zuccato *et al*, 2003), *Srebf2*  
19 (Valenza *et al*, 2005), and *Foxp1* (Tang *et al*, 2012) -- were overrepresented for differentially  
20 expressed genes in our model, but only at later time points or more weakly than our top 48 core  
21 regulator TFs.

22 Our results suggest that HD involves parallel changes in distinct down- vs. up-regulated  
23 TF sub-networks. Targets of TFs in the down-regulated sub-network are enriched for synaptic  
24 genes and appear to be primarily neuronal. Targets of TFs in the up-regulated sub-network are  
25 enriched for stress response pathways (e.g., DNA damage repair, apoptosis). These up-regulated  
26 networks appear to involve processes occurring in both neurons and glia. Several previous  
27 studies provide independent support for synaptic changes in medium spiny neurons and of  
28 activated gliosis in HD pathogenesis (Deng *et al*, 2013; Singhrao *et al*, 1999; Hsiao *et al*, 2013).

29 Replication across four independent datasets revealed 13 TFs whose target genes were  
30 most consistently enriched among differentially expressed genes. We propose that these TFs  
31 should be prioritized for follow-up experiments, both to validate predicted target genes and to  
32 evaluate specific biological functions for each TF. For instance, it will be interesting to  
33 determine which (if any) of the core TFs have direct protein-protein interactions with the HTT  
34 protein and to test our model's predictions about TF perturbations with specific aspects of HD  
35 pathology. The target genes for most of these 13 TFs were enriched for genes that were down-  
36 regulated in HD and for neuron-specific genes, consistent with the idea that pathological changes  
37 originate in medium spiny neurons.

38 Our ChIP-seq data confirm an association between SMAD3 binding sites and genes that  
39 are down-regulated in HD. SMAD3 is best known for its role in mediating signaling by  
40 Transforming Growth Factor-Beta (TGF- $\beta$ ) signaling (Kandasamy *et al*, 2011). Several recent  
41 studies have described altered TGF- $\beta$  signaling in the early stages of HD (Ring *et al*, 2015;  
42 Battaglia *et al*, 2011). However, to our knowledge a role for SMAD3 has not been described.  
43 These findings suggest that intriguing possibility that agonists of TGF- $\beta$  signaling could have  
44 therapeutic benefit in HD patients. Consistent with this possibility, TGF- $\beta$  treatment has recently  
45 been shown to reduce apoptotic cell death in neural stem cells with expanded *HTT* polyQ tracts  
46 (Ring *et al*, 2015).

1 Our method to reconstruct TRNs by integrating information about TF occupancy with  
2 gene co-expression is likely to be broadly applicable, providing a strategy to optimize both  
3 mechanistic and quantitative accuracy. TRN reconstruction methods based purely on gene co-  
4 expression struggle to distinguish direct vs. indirect interactions. Physical models of TF  
5 occupancy provide poor quantitative predictions because many TF binding sites are non-  
6 functional or do not regulate the nearest gene. Our study demonstrates that integrated TRN  
7 modeling can be utilized effectively to study neurodegenerative diseases such as HD, combining  
8 data from the ENCODE project with disease specific transcriptome profiling.  
9

## 10 **Methods**

11  
12 **Referenced datasets.** We obtained RNA-seq and microarray gene expression profiling data from  
13 the following GEO Datasets (<http://www.ncbi.nlm.nih.gov/geo/>): GSE65776 (Langfelder *et al*,  
14 2016), GSE18551 (Becanovic *et al*, 2010), GSE32417 (Giles *et al*, 2012), GSE9038 (Fossale *et*  
15 *al*, 2011), GSE9857 (Kuhn *et al*, 2007), GSE26927 (Durrenberger *et al*, 2015), GSE3790  
16 (Hodges *et al*, 2006). We obtained proteomics data from the PRIDE archive  
17 (<https://www.ebi.ac.uk/pride/archive/>), accession PXD003442 (Langfelder *et al*, 2016). For  
18 RNA-seq data (GSE65776), we downloaded read counts and FPKM estimates, mapped to  
19 ENSEMBL gene models. For Affymetrix microarrays (GSE18551, GSE32417, GSE9038,  
20 GSE9857, GSE26927, and GSE3790) we downloaded raw image files and used the affy package  
21 in R to perform within-sample RMA normalization and between-sample quantile normalization.  
22 For proteomics data, we downloaded MaxQuant protein quantities.  
23

24 **Genomic footprinting.** DNase-I digestion of genomic DNA followed by deep sequencing  
25 (DNase-seq) enables the identification of genomic footprints across the complete genome. We  
26 predicted genome-wide transcription factor binding sites (TFBSs) in the mouse and human  
27 genomes based on instances of TF sequence motifs in digital genomic footprints from the  
28 ENCODE project. Short regions of genomic DNA occupied by DNA-binding proteins produce  
29 characteristic “footprints” with altered sensitivity to the DNase-I enzyme. DNase-I  
30 digestion of genomic DNA followed by deep sequencing (DNase-seq) enables the identification  
31 of genomic footprints across the complete genome.

32 For the human TFBS model, we used a previously described database (Plaisier *et al*,  
33 2016) of footprints from DNase-seq of 41 cell types (Neph *et al*, 2012). For the mouse TFBS  
34 model, we downloaded digital genomic footprinting data (deep DNase-seq) for 23 mouse tissues  
35 and cell types (Yue *et al*, 2014) from the UCSC ENCODE portal on October 29, 2013:  
36 <ftp://hgdownload.cse.ucsc.edu/goldenPath/mm9/database/>. We detected footprints in each  
37 sample with Wellington (Piper *et al*, 2013), using a significance threshold,  $p < 1e-10$ . Using  
38 FIMO (Grant *et al*, 2011), we scanned the mouse genome (mm9) for instances of 2,547 motifs  
39 from TRANSFAC (Matys *et al*, 2006), JASPAR (Mathelier *et al*, 2014), UniPROBE (Hume *et*  
40 *al*, 2015), and high-throughput SELEX (Jolma *et al*, 2013). We intersected footprints from all  
41 tissues with motif instances to generate a genome-wide map of predicted TFBSs. A motif can be  
42 recognized by multiple TFs with similar DNA-binding domains. We assigned motifs to TF  
43 families using annotations from the TFClass database (Wingender *et al*, 2013). In total, our  
44 model included motifs recognized by 871 TFs.  
45

1 **Regression-based transcriptional regulatory network models.** We fit a regression model to  
2 predict the expression of each gene in mouse or human striatum, based on the expression patterns  
3 of TFs that had predicted binding sites within 5kb of that gene's transcription start sites. We  
4 applied LASSO regularization to penalize regression coefficients and remove TFs with weak  
5 effects, using the glmnet package in R. These methods were optimized across several large  
6 transcriptomics datasets, prior to their application to the Huntsington's disease data. To  
7 reconstruct the TRN model for mouse striatum, we used RNA-seq data from the striatum of 208  
8 mice (Langfelder *et al*, 2016). Prior to network reconstruction, we evaluated within and between  
9 group variance and detected outlier samples using hierarchical clustering and multidimensional  
10 scaling. No major differences in variance were identified between groups, and no outlier samples  
11 were detected or removed.

12 We considered a variety of model parameterization during the initial model formulation.  
13 We considered elastic net regression and ridge regression as alternatives to LASSO regression.  
14 We selected LASSO based on the least falloff in performance from the training data to test sets  
15 in five-fold cross-validation. We note that when multiple TFs have correlated expression, the  
16 LASSO will generally retain only one for the final model. This feature of the LASSO has been  
17 considered advantageous, since it can eliminate indirect interactions. However, there is virtually  
18 no doubt that the TFs selected by our model underestimate the true number of TF-target gene  
19 interactions. We would only pick up dominant effects where a linear model works reasonably  
20 well. Our primary interest is ultimately in using this approach to find a relatively small number  
21 of targets based on multiple lines of evidence. We are less concerned with finding everything  
22 than in trying to make sure what we do find is as highly enriched for true positives as possible.

23 We also considered a variety of strategies to select an appropriate penalty parameter. For  
24 instance, we could apply an independent penalty parameter for each gene, or we could use a  
25 uniform penalty parameter across all genes. We found that optimal performance was obtained in  
26 both training data and in five-fold cross-validation when we applied a uniform penalty parameter  
27 across all genes. We assigned this penalty parameter by evaluating performance in cross-  
28 validation across a range of possible parameters for a random subset of 100 genes. For each  
29 gene, we identified the most stringent penalty such that the unfitted variance was  $< 1$  standard  
30 error greater than the minimum unfitted variance across all the penalty parameters considered.  
31 We selected the median penalty defined by this procedure across the 100 randomly selected  
32 gene.

33 Not all genes' expression can be accurately predicted based on the expression of TFs. To  
34 select genes for the final model, we evaluated the variance explained by the model in a training  
35 set consisting of 80% of the data. We selected those genes for which the model explained  $>50\%$   
36 of expression variance in the training set and carried these genes forward to a test set, consisting  
37 of the remaining 20% of genes. We found that training set performance accurately predicted test  
38 performance ( $r = 0.94$ ). We therefore fit a final model for genes whose expression could be  
39 accurately predicted in the training set. The result of these procedures is a tissue-specific TRN  
40 model, predicting the TFs that regulate each gene in the striatum and assigning a positive or  
41 negative weight for each TF's effect on that gene's expression in the striatum.

42  
43 **Enrichments of TF-target gene modules in ChIP-seq data.** We downloaded ChIP-seq data  
44 from the ENCODE website ([encodeproject.org](http://encodeproject.org), accessed August 20, 2015) for 33 mouse  
45 transcription factors included in our TRN model. We identified genes whose transcription start  
46 sites were located within 5kb of a narrowPeak in each ChIP experiment. We also downloaded a



1 table of ChIP-to-gene annotations for 19 additional mouse TFs from the ChEA website  
2 (<http://amp.pharm.mssm.edu/lib/chea.jsp>, accessed August 6, 2015). We tested for enrichments  
3 of the target genes identified by ChIP for each of these 52 TFs to predicted TFBSs from our  
4 model.

5  
6 **Enrichments of TF-target gene modules for Gene Ontology terms.** We downloaded Gene  
7 Ontology (GO) annotations for mouse genes from GO.db on November 4, 2015, using the  
8 topGO R package. We extracted the genes annotated to each GO term and its children, and we  
9 used Fisher's exact tests to characterize enrichments of TF-target gene modules for the 4,624 GO  
10 terms that contain between 10 and 500 genes.

11  
12 **Enrichments of TF-target gene modules for cell type-specific genes.** We characterized sets of  
13 genes expressed in each striatal cell type using gene expression profiles from purified cell types  
14 (Doyle *et al*, 2008; Zhang *et al*, 2014) and the pSI R package for Cell-type Specific Expression  
15 Analysis (Dougherty *et al*, 2010). We used Fisher's exact tests to characterize enrichments of  
16 TF-target gene modules for genes expressed specifically in each cell type.

17  
18 **Enrichments of TF-target gene modules for differentially expressed genes.** We identified  
19 genes that were differentially expressed in HD vs. control samples. In the primary dataset, we  
20 compared mice with the non-pathogenic Q20 allele and mice with each of the other five alleles,  
21 separately for 2-, 6-, and 10-month-old mice. We used the edgeR R package to fit generalized  
22 linear models and test for significance of each contrast. We used Fisher's exact tests to  
23 characterize enrichments of down-regulated genes and up-regulated genes in each condition  
24 (significance threshold for differentially expressed genes,  $p < 0.01$ ) for the target genes of each  
25 TF. We considered enrichments to be statistically significant at a raw p-value threshold  $< 1e-6$ ,  
26 or an adjusted p-value  $< 0.02$  after accounting for 19,170 tests (639 TFs x 5 *Htt* alleles x 3 time  
27 points x 2 tests / condition).

28 To identify top TFs, accounting for non-independence among genes and conditions, we  
29 calculated an empirical false discovery rate for these enrichments. We repeated the edgeR and  
30 enrichment analyses 1,000 times with permuted sample labels. We found that no module had a p-  
31 value  $< 1e-6$  in more than four conditions in any of the permuted datasets. Therefore, we focused  
32 on TFs whose target genes were overrepresented for differentially expressed genes in five or  
33 more conditions.

34 We performed similar analyses to characterize TF-target gene modules enriched for  
35 genes that were differentially expressed in replication samples. We used the limma R package to  
36 calculate differentially expressed genes in each of the four microarray studies from mouse  
37 striatum (Giles *et al*, 2012; Kuhn *et al*, 2007; Fossale *et al*, 2011; Becanovic *et al*, 2010). We  
38 calculated enrichments of the DEGs from each study for TF-target gene modules. We then  
39 combined the enrichment p-values across the four studies using Fisher's method to produce a  
40 meta-analysis p-value for the association of each TF-target gene module in HD mouse models.

41 We used quantitative proteomics data from 6-month old *Htt*<sup>Q20/+</sup>, *Htt*<sup>Q80/+</sup>, *Htt*<sup>Q92/+</sup>,  
42 *Htt*<sup>Q111/+</sup>, *Htt*<sup>Q140/+</sup> and *Htt*<sup>Q175/+</sup> mice (n = 8 per group) (Langfelder *et al*, 2016). We  
43 characterized proteins whose abundance was correlated with *Htt* CAG length in the striatum of  
44 6-month-old mice, using MaxQuant protein quantities. We then calculated enrichments of CAG-  
45 length correlated proteins (Pearson correlation,  $p < 0.01$ ) for each TF-target gene module with



1 Fisher's exact test, separately for proteins whose abundance was positively or negatively  
2 correlated with CAG length.

3 We used the limma R package to fit a linear model to characterize differentially  
4 expressed genes in each of two microarray datasets (Hodges *et al*, 2006; Durrenberger *et al*,  
5 2015) profiling dorsal striatum of HD cases vs. controls, treating sex as a covariate. We  
6 calculated enrichments of the DEGs from each study for TF-target gene modules. We then  
7 combined the enrichment p-values across the two studies using Fisher's method to produce a  
8 meta-analysis p-value for the association of each TF-target gene module with HD.

9  
10 **Mouse Breeding, Genotyping, and microdissection.** The B6.*Htt*<sup>Q111/+</sup> mice (Strain 003456; JAX)  
11 used for the ChIP-seq study have a targeted mutation replacing a portion of mouse *Htt* (formerly  
12 *Hdh*) exon 1 with the corresponding portion of human *HTT* (formerly *IT15*) exon 1, including an  
13 expanded CAG tract (originally 109 repeats). Mice used in the present study were on the  
14 C57BL/6J inbred strain background. The targeted *Htt* allele was placed from the CD-1  
15 background onto the C57BL/6J genetic background by selective backcrossing for more than 10  
16 generations to the C57BL/6J strain at Jackson laboratories. Cohorts of heterozygote and wild-  
17 type littermate mice were generated by crossing B6.*Htt*<sup>Q111/+</sup> and B6.*Htt*<sup>+/+</sup> mice. Male mice were  
18 sacrificed at 122 ± 2 days of age (or 16 weeks) via a sodium phenobarbital based euthanasia  
19 solution (Fatal Plus, Henry Schein). Both hemispheres of each animal's brain was microdissected  
20 on ice into striatum, cortex, and remaining brain regions. These tissues were snap frozen and  
21 stored in -80°C. Experiments were approved by an institutional review board in accordance with  
22 NIH animal care guidelines.

23  
24 **High resolution X-ChIP-seq.** We prepared duplicate ChIP samples for each antibody from four-  
25 month-old *Htt*<sup>Q111/+</sup> and from age-matched wildtype mice. For each ChIP preparation, chromatin  
26 DNA was prepared using the combined striatal tissue from both hemispheres of three mice.  
27 Preliminary experiments suggested that this was the minimal amount of material required to  
28 provide enough material for multiple IPs. Striata were transferred to a glass dounce on ice and  
29 homogenized in cold PBS with protease inhibitors. High-resolution X-ChIP-seq was performed  
30 as described (Skene *et al*, 2010), with slight modifications. IPs were performed using Abcam  
31 Anti-SMAD3 antibody ab28379 [ChIP grade] or Anti-RNA polymerase II CTD repeat  
32 YSPTSPS antibody [8WG16] [ChIP Grade] ab817. Sequencing libraries were prepared from the  
33 isolated ChIP DNA and from input DNA controls as previously described (Orsi *et al*, 2015).  
34 Libraries were sequenced on an Illumina HiSeq 2500 sequencer to a depth of ~17-25 million  
35 paired-end 25 bp reads per sample. Sequence reads have been deposited in GEO, accession  
36 GSE88775.

37  
38 **ChIP-seq analysis.** Sequencing reads were aligned to the mouse genome (mm9) using bowtie2  
39 (Langmead & Salzberg, 2012). Peak-calling on each sample was performed with MACS v2.1  
40 (Zhang *et al*, 2008), scaling each library to the size of the input DNA sequence library to  
41 improve comparability between samples. We retained peak regions with a significant MACS p-  
42 value (FDR < 0.01 and a read count ≥ 10 in at least two of the individual ChIP samples).  
43 Enrichment of the SMAD3 motif (JASPAR CORE MA0513.1) was performed with CentriMo  
44 (Bailey & Machanick, 2012), using the 250bp regions around peak summits obtained by running  
45 MACS on the combined reads from all the samples. Peaks were mapped to genes using the  
46 chipenrich R package (Welch *et al*, 2014), and genes were ranked by the number of peaks within

1 10kb of each gene's transcription start sites. Gene Ontology enrichment analysis of the top  
2 SMAD3 target genes (peak counts >2 s.d. above the mean), was performed using Fisher's exact  
3 test, using the same set of GO terms used to analyze the computationally derived TF-target gene  
4 modules. Statistical analysis of differential occupancy in *Htt*<sup>Q111/+</sup> vs. wildtype mice was  
5 performed with edgeR (Robinson *et al*, 2010).  
6

7 **Software and Primary Data Resources.** Code for analysis of gene expression, transcriptional  
8 regulatory networks, and ChIPseq data for this manuscript are publicly available in the github  
9 repository located at <https://github.com/seth-ament/hd-trn>. Bedgraph files and raw sequencing  
10 data for SMAD3 and RNA Pol2 ChIP-seq can be accessed at the GEO repository  
11 #GSE88775 prior to publication  
12 at <https://www.ncbi.nlm.nih.gov/geo/query/acc.cgi?token=oryzgqerzmvdaf&acc=GSE88775>.  
13

#### 14 **Acknowledgements**

15  
16 This work was supported by a contract from the CHDI Foundation (N.D.P., Principal  
17 Investigator and J.B.C, Principal Investigator). J.R.P. is supported by a National Science  
18 Foundation Graduate Research Fellowship. J.B.C. is supported by Huntington Society of  
19 Canada New Pathways Program.  
20

#### 21 **Conflict of Interests**

22  
23 The authors declare that they have no conflict of interest.  
24

## 1 **Figure Legends**

2

3 **Figure 1. Reconstruction and validation of a transcriptional regulatory network (TRN)**  
4 **model of the mouse striatum.** a. Schematic for reconstruction of tissue-specific TRN models by  
5 combining information about TF binding sites with evidence from co-expression. b. Training  
6 (black) and test set (blue) prediction accuracy for genes in the mouse striatum TRN model.  
7 Genes are ordered on the x-axis according to their training set prediction accuracy ( $r^2$ , predicted  
8 vs. actual expression). c. Distribution for the number of predicted regulators per target gene. d.  
9 Distribution for the number of predicted target genes per TF. e. Enrichments of TF-target gene  
10 interactions in the mouse striatum TRN for TFBSs supported by DNase footprints identified in  
11 23 tissues.

12

13 **Figure 2. Robust changes in striatal gene expression in two-, six-, and ten-month-old HD**  
14 **knock-in mice.** Counts of differentially expressed genes ( $p < 0.01$ ) in each mouse model at each  
15 time point.

16

17 **Figure 3. Replication of core TFs in independent datasets.** a. Venn Diagram showing overlap  
18 between core regulator TF-target gene modules identified in the primary RNA-seq dataset,  
19 compared to TF-target gene modules enriched for differentially expressed genes in three  
20 independent datasets. b.  $-\log_{10}(p\text{-values})$  for the strength of enrichment of each of the core  
21 regulator TF-target gene modules for differentially expressed genes in each of the four datasets.

22

23 **Figure 4. Predicted TF-to-TF interactions among 48 putative core regulators of**  
24 **transcriptional changes in mouse models of Huntington's disease.** Nodes and edges indicate  
25 direct regulatory interactions between TFs predicted by the mouse striatum TRN model. Solid  
26 black arrows and dotted red arrows indicate positive vs. inhibitory regulation, respectively, and  
27 the width of the line is proportional to the predicted effect size. Blue and orange shading of  
28 nodes indicates that the TF's target genes are overrepresented for down-regulated vs. up-  
29 regulated genes in HD mouse models. If a TF's target genes are enriched in both directions, the  
30 stronger enrichment is shown. Each panel indicates the network state in a specific condition. **a.**  
31 two-month-old *Htt*<sup>Q92/+</sup> mice. **b.** six-month-old *Htt*<sup>Q92/+</sup> mice. **c.** two-month-old *Htt*<sup>Q175/+</sup> mice. **d.**  
32 six-month-old *Htt*<sup>Q175/+</sup> mice.

33

34 **Figure 5. Enrichments of the 48 core TFs for differentially expressed genes in each**  
35 **condition and for cell type-specific genes.** a. Enrichments of each TF's target genes for down-  
36 and up-regulated genes for each HTT allele at each time point. b. Enrichments of each TF's  
37 target genes for genes expressed specifically in one of seven major cell types in the mouse  
38 striatum.

39

40 **Figure 6. SMAD3 expression, genomic occupancy, and target gene expression in the**  
41 **striatum of HD mouse models.** **a.** Progressive age- and *Htt*-allele-dependent changes in the  
42 expression of SMAD3 in mouse striatum. Bars indicate z-scores for the expression level in  
43 heterozygous mice with each pathogenic *Htt* allele compared to age-matched *Htt*<sup>Q20/+</sup> mice. **b.**  
44 Distribution of the distances of 57,772 SMAD3 peaks identified by ChIP-seq to the nearest  
45 transcription start site (TSS). **c.** The summits of SMAD3 peaks are enriched for the sequence  
46 motif recognized by SMAD3 (JASPAR CORE MA0513.1, shown in inset). **d.** Overlap between

1 peaks identified in *Htt*<sup>Q111/+</sup> vs. wildtype mice. e. SMAD3 occupancy is decreased at a subset of  
2 peaks in *Htt*<sup>Q111/+</sup> vs. wildtype mice. x-axis and y-axis represent the log<sub>2</sub>(fold change) and –  
3 log<sub>10</sub>(p-value), respectively, for each peak region. f. Age- and *Htt*-allele-dependent expression  
4 patterns of the top 50 most strongly differentially expressed SMAD3 target genes. g, h, i.  
5 Genomic occupancy of SMAD3 and RNA polymerase II and accessibility of genomic DNA to  
6 DNase-I near *Adcy5* (g), *Kcnt1* (h), and *Pde1b* (i).  
7

# 1 Figure 1.

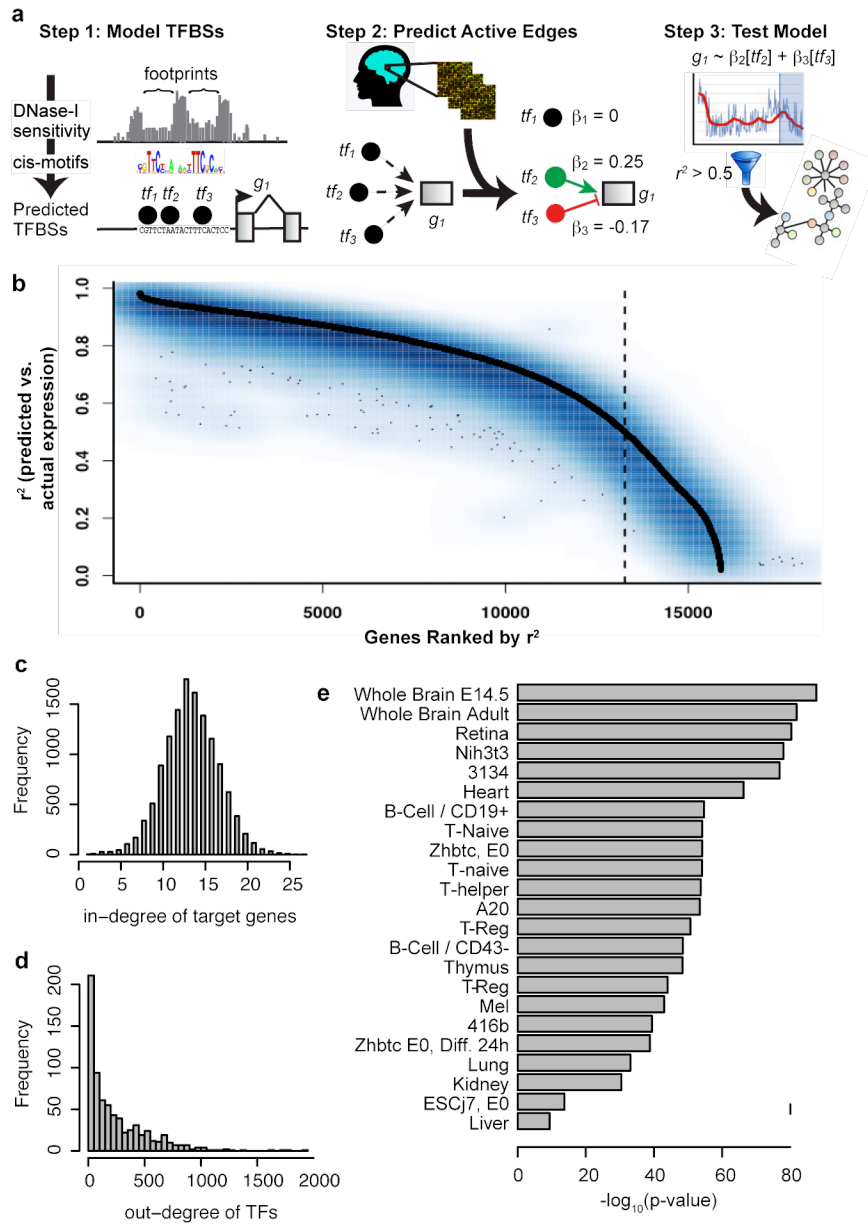

2  
 3  
 4



1 **Figure 2.**

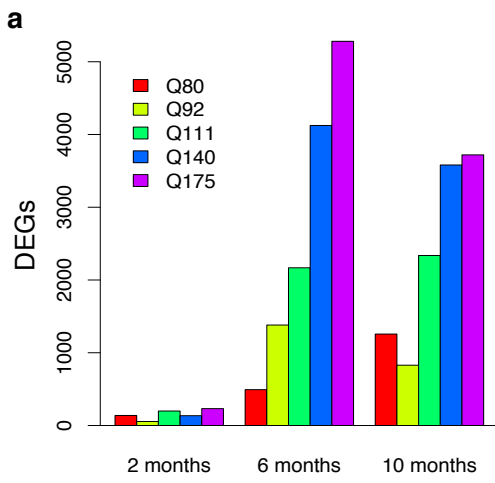

2





1 Figure 5.

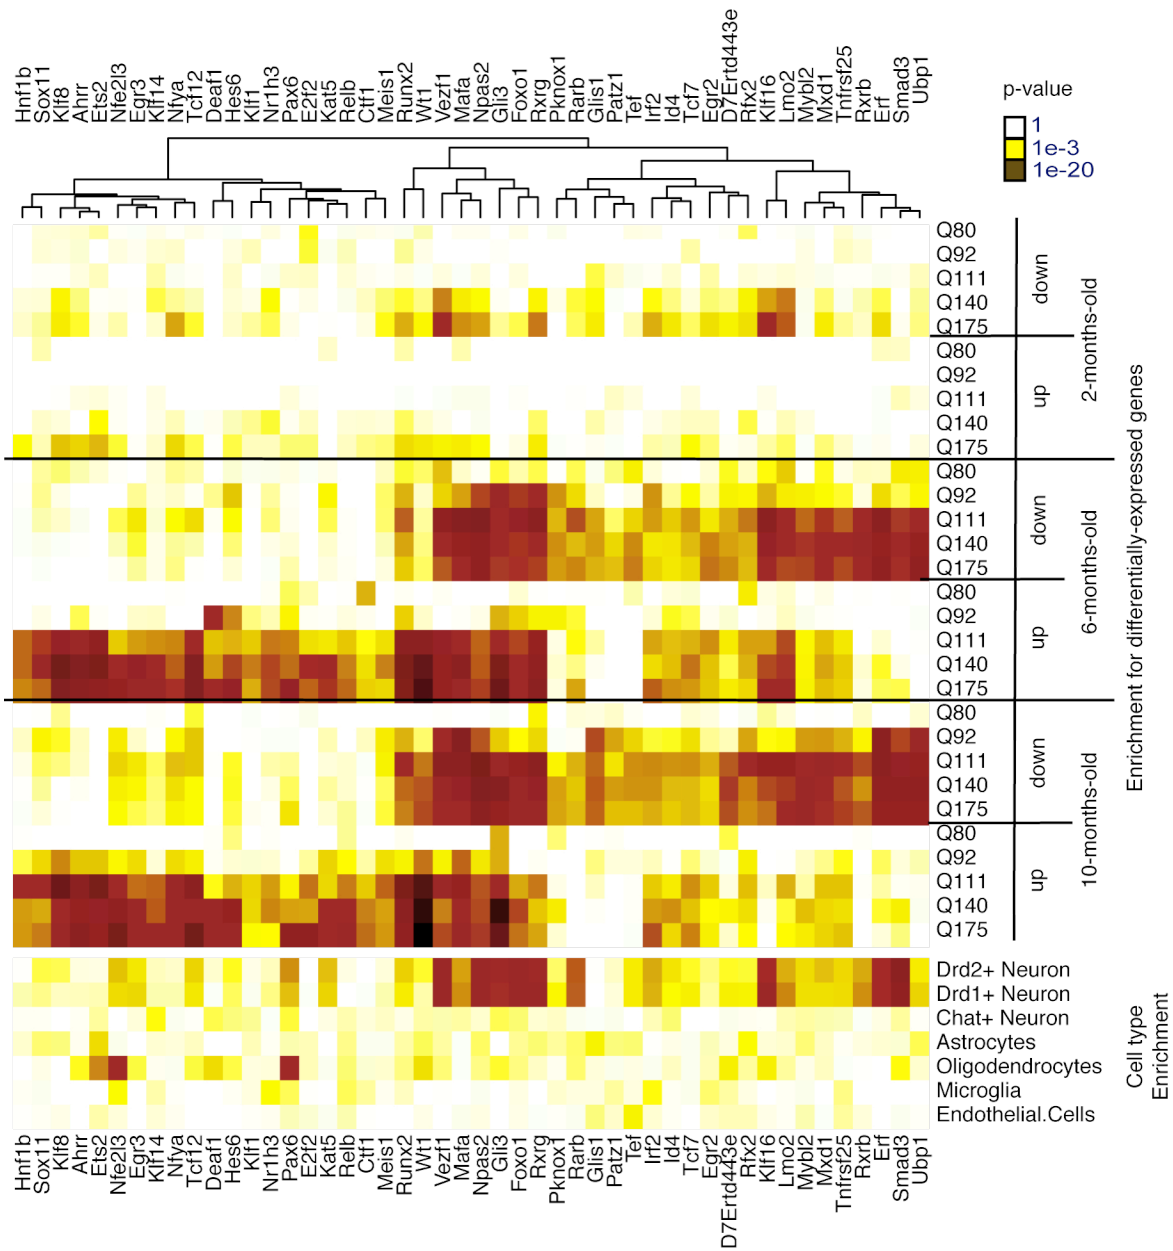

2  
3  
4  
5  
6  
7  
8  
9  
10

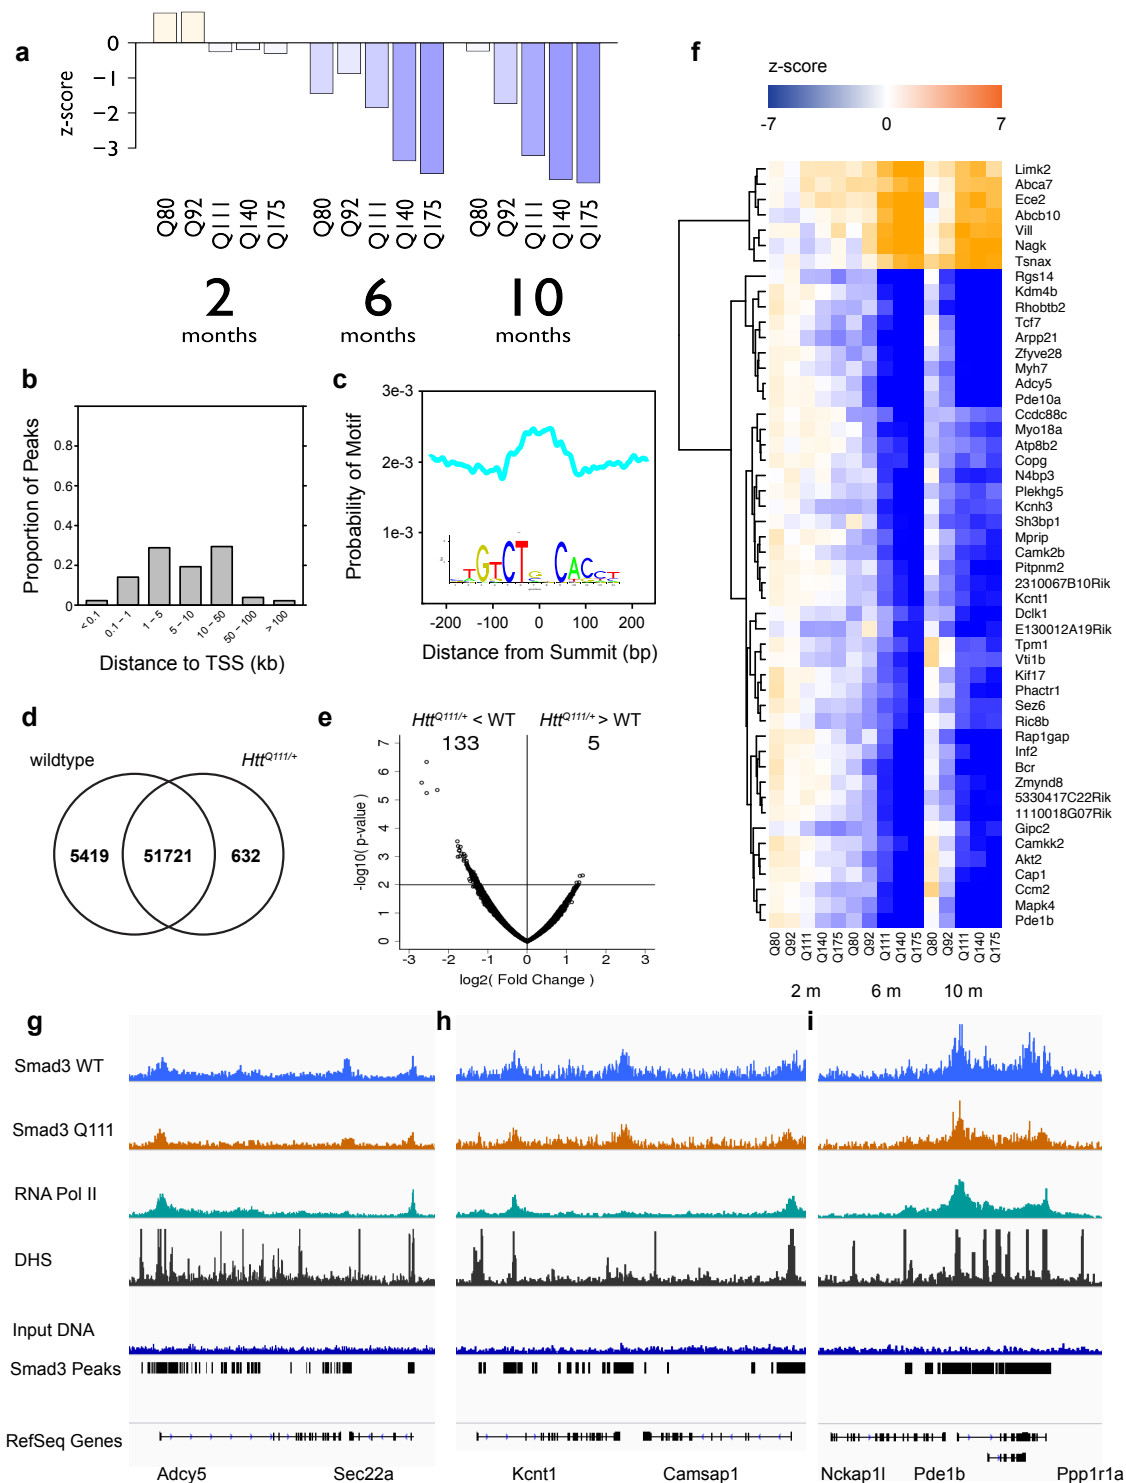



1 **Supplementary Information**

2

3 **SI Figure 1. Association between TRN prediction accuracy and expression level.** Each point  
4 on the scatterplot represents the mean expression level of a gene in the striatum (x-axis;  
5 fragments per kilobase million, FPKM) and the prediction accuracy for that gene in the  
6 transcriptional regulatory network model ( $r^2$ , predicted vs. observed expression across all  
7 samples).

8

9 **SI Figure 2. Comparison of TF binding site predictions to ChIP-seq data.** For each of 52  
10 TFs, we compared the sets of genes adjacent to predicted TF binding sites in our model to the  
11 sets of genes adjacent to observed binding sites from ChIP-seq studies. **a.**  $-\log_{10}(p\text{-values})$  for  
12 overlap between modeled vs. observed gene sets (Fisher's exact test). **b.** Distribution of recall  
13 (sensitivity) and precision (positive predictive accuracy) of the TFBS model for identifying the  
14 target genes of each TF identified by ChIP-seq.

15

16 **SI Figure 3. TFs with >1,000 predicted target genes.** Bars indicate the number of predicted  
17 target genes for each of the 15 TFs with >1,000 predicted target genes in the TRN model for the  
18 mouse striatum.

19

20 **SI Figure 4. Enrichments of TF modules within each striatal cell type.** Enrichments of the  
21 predicted target genes of each TF for genes expressed specifically in one of seven major cell  
22 types in the mouse striatum. The top 20 TF modules are shown for each cell type, ranked by the  
23  $-\log_{10}(p\text{-value})$  for the strength of enrichment in a one-sided Fisher's exact test.

24

25 **SI Figure 5. Core regulator TFs are differentially expressed in the striatum of HD CAG  
26 knock-in mice.** z-scores indicate significance and direction of expression changes in each  
27 condition, relative to age-matched *Htt*<sup>Q20/+</sup> mice.

28

29 **SI Figure 6. Reconstruction of a TRN model of the human striatum.** a. Training (black) and  
30 test set (blue) prediction accuracy for genes in the human striatum TRN model. b. Distribution  
31 for the number of predicted regulators per target gene. c. Distribution for the number of predicted  
32 target genes per TF. d. Enrichment of down-regulated core regulator TFs identified in mouse  
33 striatum for down-regulated genes in HD cases vs. controls. e. Enrichment of up-regulated core  
34 regulator TFs identified in mouse striatum for up-regulated genes in HD cases vs. controls.

35

1 **SI Figure 1.**

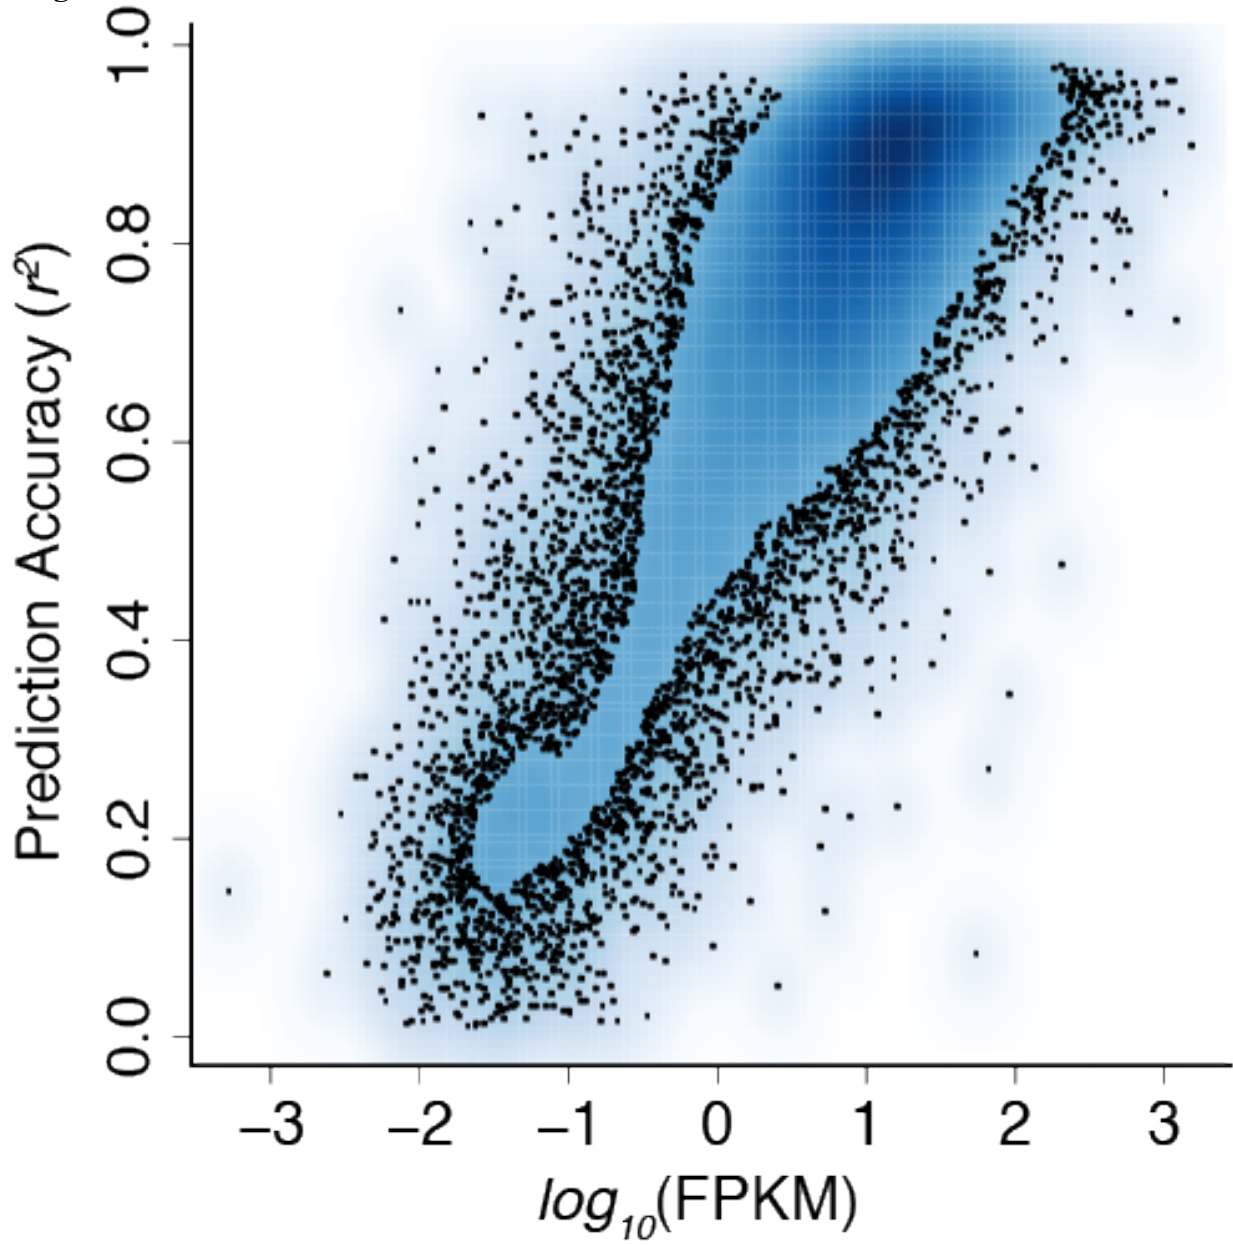

2  
3

1 **SI Figure 2.**

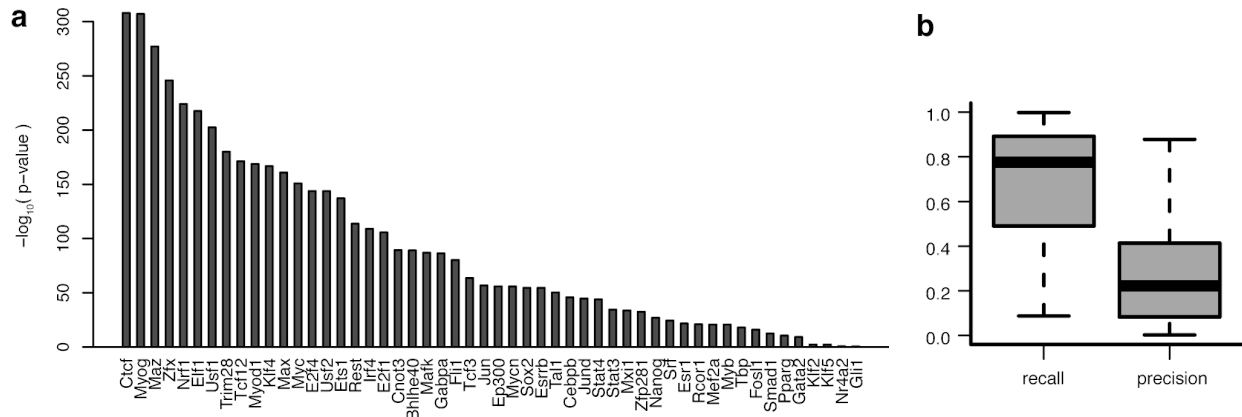

2  
3  
4

1  
2 **SI Figure 3.**

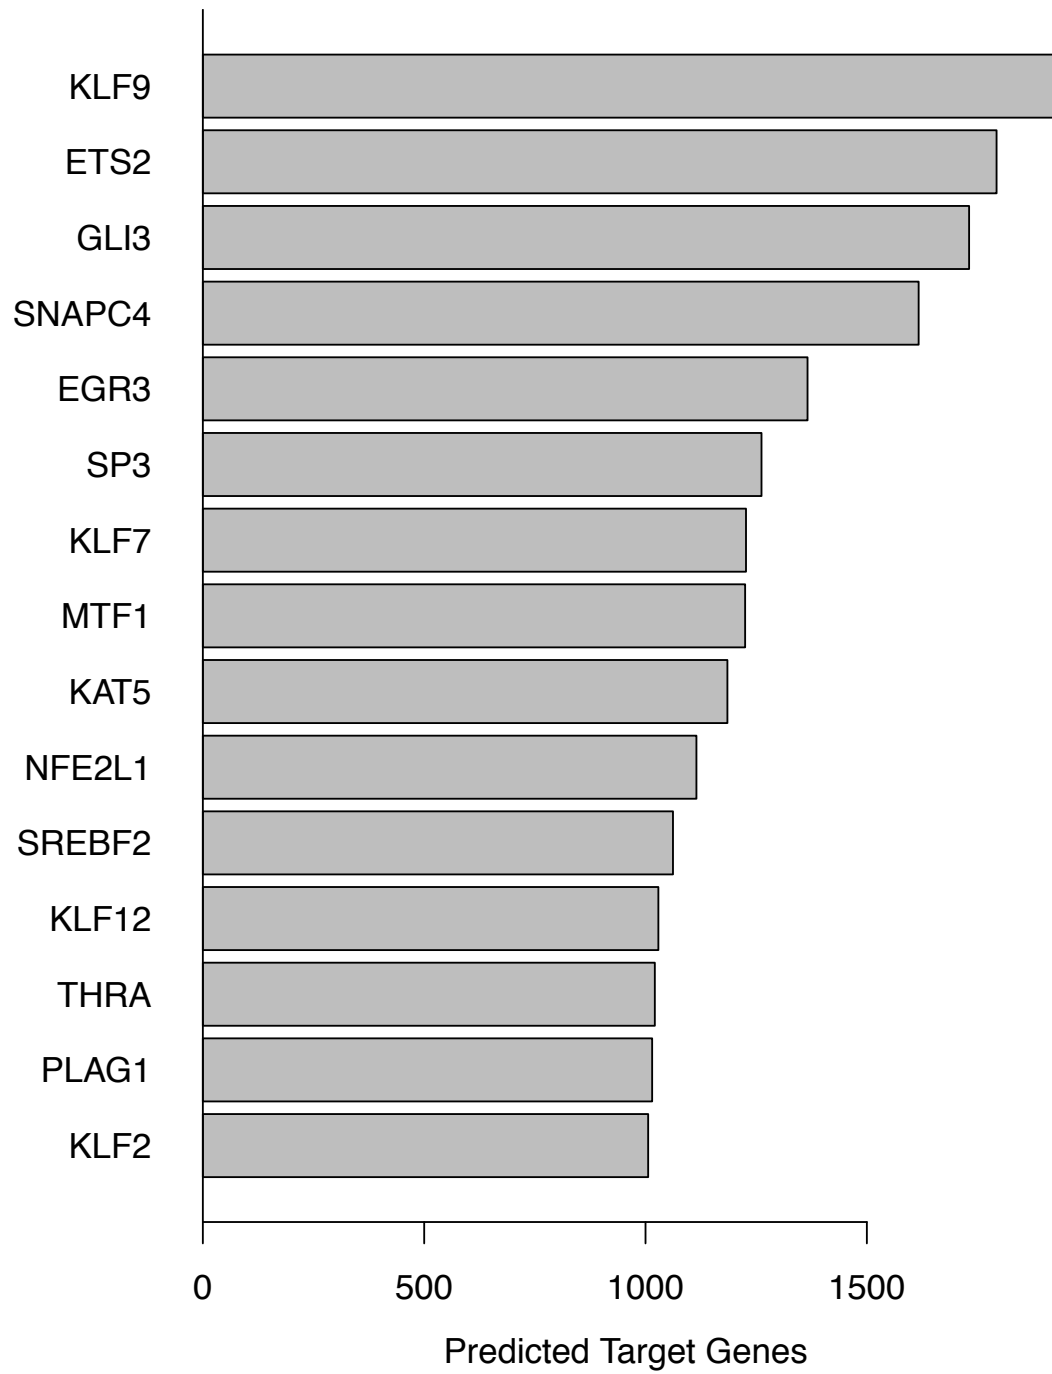

3

1 **SI Figure 4.**

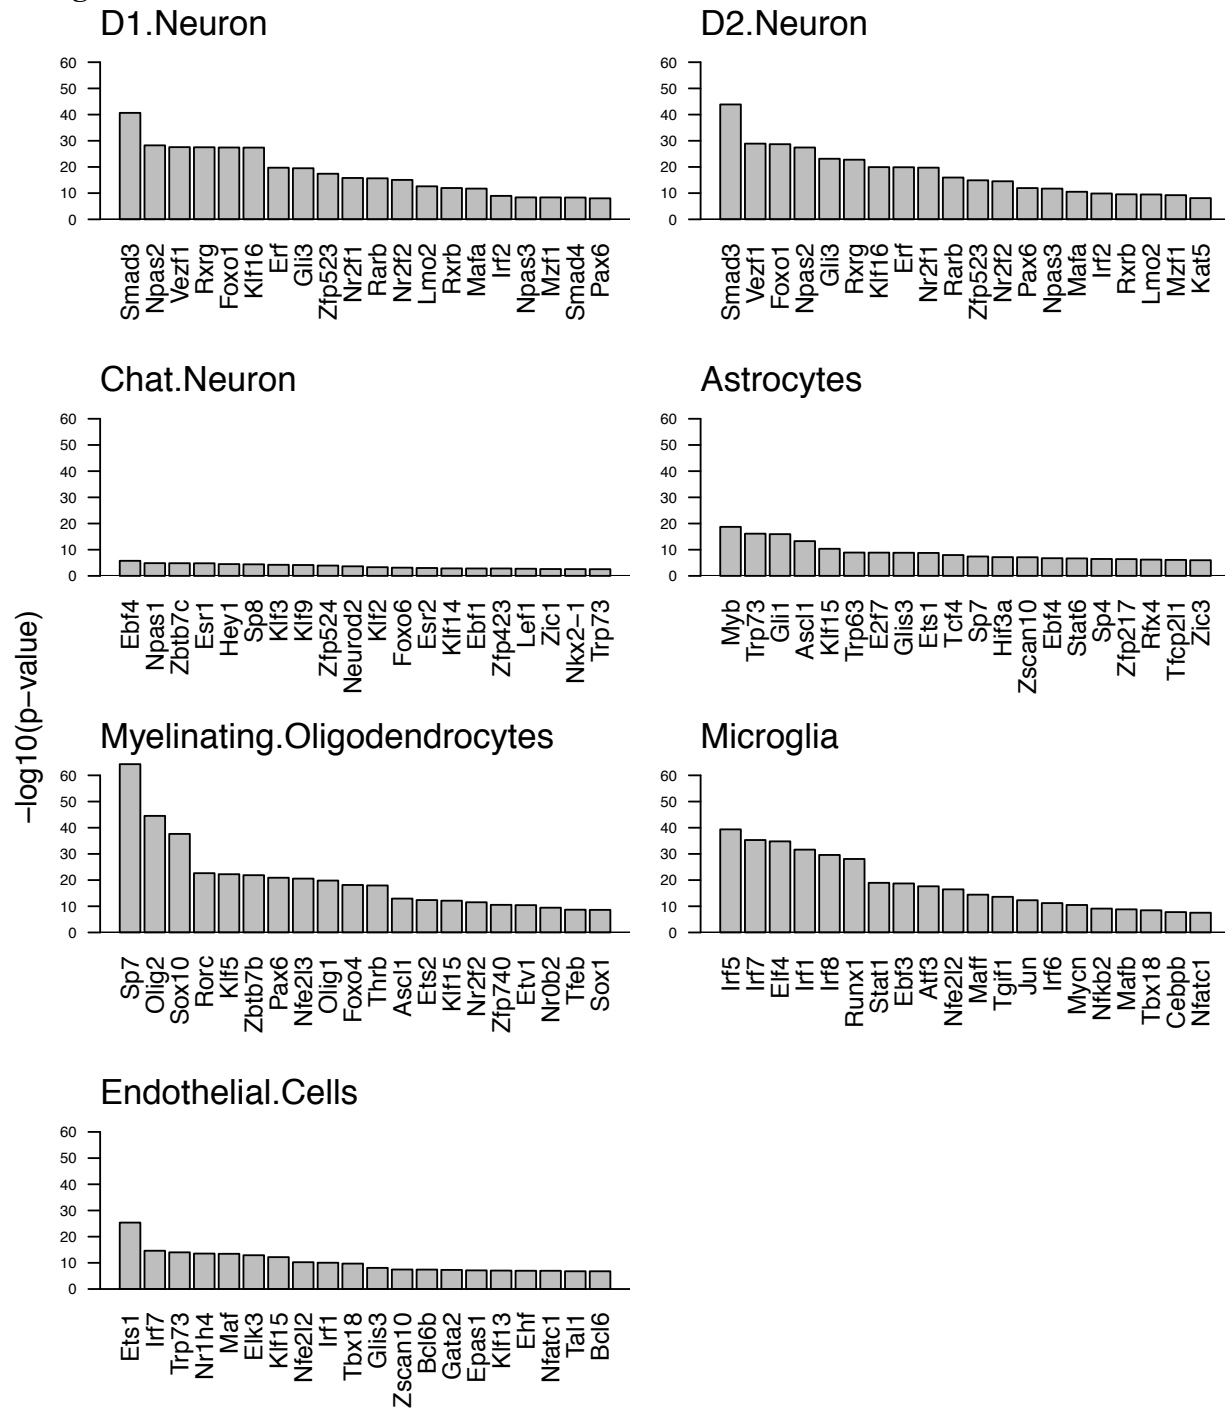

2  
3



# 1 SI Figure 5

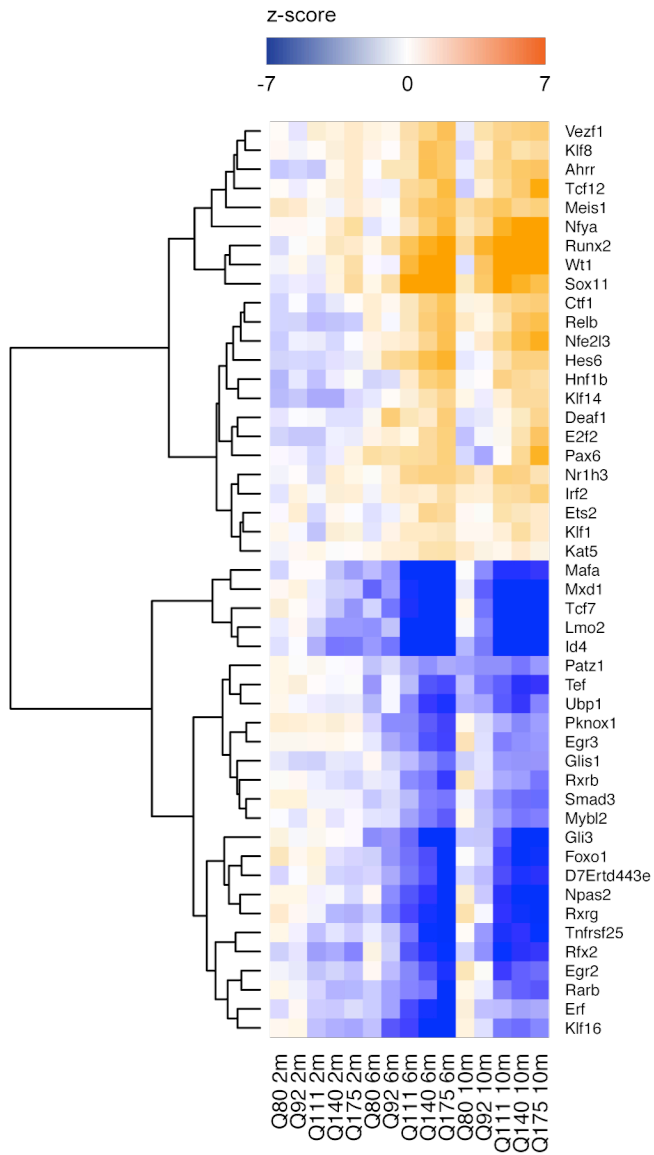

2  
3

1 **SI Figure 6**

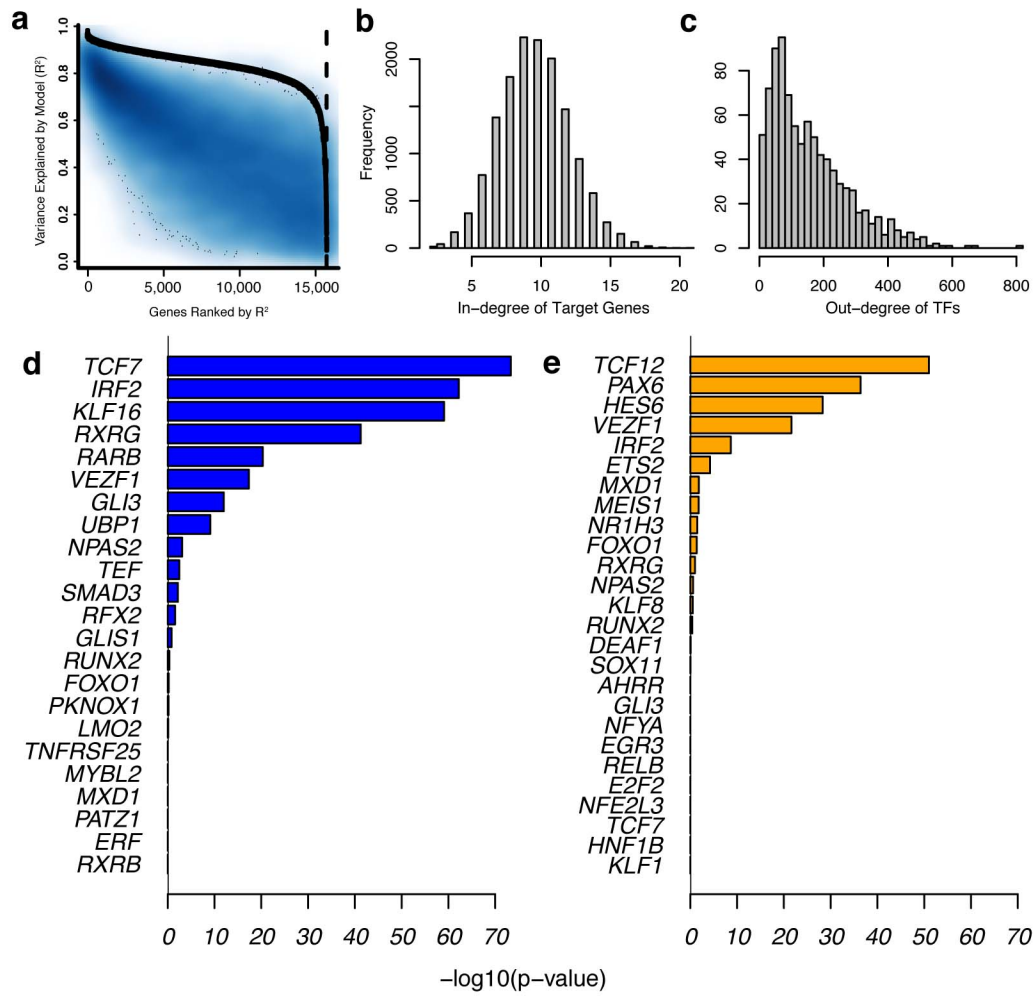

2  
3

1 **SI Table 1. GO enrichments of top 837 SMAD3 target genes.**

| Term                                          | Set Size | SMAD3 Targets | Odds Ratio | P-Value | FDR     |
|-----------------------------------------------|----------|---------------|------------|---------|---------|
| Actin Filament-Based Process                  | 442      | 41            | 3.6        | 4.2E-11 | 1.9E-07 |
| mRNA Processing                               | 344      | 32            | 3.7        | 4.2E-09 | 9.6E-06 |
| Acting Binding                                | 332      | 30            | 3.6        | 2.1E-08 | 2.4E-05 |
| Neuromuscular Process Controlling Balance     | 59       | 12            | 8.5        | 1.2E-07 | 9.4E-05 |
| Histone Modification                          | 293      | 26            | 3.6        | 1.7E-07 | 1.1E-04 |
| Brain Development                             | 432      | 32            | 2.8        | 1.3E-06 | 4.9E-04 |
| Chromatin Binding                             | 387      | 29            | 2.8        | 2.7E-06 | 9.3E-04 |
| Actin Filament-Based Movement                 | 65       | 11            | 6.8        | 2.8E-06 | 9.3E-04 |
| Regulation of Cell Projection Organization    | 380      | 28            | 2.8        | 4.5E-06 | 1.3E-03 |
| Lamellipodium                                 | 114      | 14            | 4.8        | 5.5E-06 | 1.4E-03 |
| Protein Serine/Threonine Kinase Activity      | 409      | 29            | 2.6        | 9.9E-06 | 2.3E-03 |
| Protein Deacetylation                         | 49       | 9             | 7.5        | 1.1E-05 | 2.4E-03 |
| Centrosome                                    | 350      | 25            | 2.8        | 1.4E-05 | 2.6E-03 |
| Purine Ribonucleotide Catabolic Process       | 382      | 27            | 2.7        | 1.6E-05 | 3.0E-03 |
| Kinase Binding                                | 199      | 18            | 3.4        | 2.3E-05 | 4.0E-03 |
| Phosphoric Ester Hydrolase Activity           | 374      | 26            | 2.6        | 2.5E-05 | 4.0E-03 |
| Neuronal Cell Body                            | 411      | 28            | 2.5        | 2.5E-05 | 4.0E-03 |
| Protein Kinase Binding                        | 369      | 26            | 2.6        | 2.8E-05 | 4.2E-03 |
| Cellular Protein Catabolic Process            | 415      | 28            | 2.5        | 3.0E-05 | 4.2E-03 |
| Transcriptional Repressor Complex             | 70       | 10            | 5.6        | 3.7E-05 | 4.4E-03 |
| Respiratory System Development                | 138      | 14            | 3.8        | 5.5E-05 | 5.3E-03 |
| Kinesin Binding                               | 29       | 6             | 9.5        | 1.1E-04 | 9.3E-03 |
| Endocytosis                                   | 334      | 23            | 2.6        | 1.1E-04 | 9.3E-03 |
| Negative Regulation of ERBB Signaling Pathway | 10       | 4             | 22.1       | 1.4E-04 | 9.7E-03 |

2  
3

1 **References**

- 2
- 3 Alexandrov V, Brunner D, Menalled LB, Kudwa A, Watson-Johnson J, Mazzella M, Russell I,  
4 Ruiz MC, Torello J, Sabath E, Sanchez A, Gomez M, Filipov I, Cox K, Kwan M, Ghavami  
5 A, Ramboz S, Lager B, Wheeler VC, Aaronson J, et al (2016) Large-scale phenome  
6 analysis defines a behavioral signature for Huntington's disease genotype in mice. *Nat.*  
7 *Biotechnol.* **34**: 838–44
- 8 Arlotta P, Molyneaux BJ, Jabaudon D, Yoshida Y & Macklis JD (2008) Ctip2 controls the  
9 differentiation of medium spiny neurons and the establishment of the cellular architecture of  
10 the striatum. *J. Neurosci.* **28**: 622–32
- 11 Ashburner M, Ball CA, Blake JA, Botstein D, Butler H, Cherry JM, Davis AP, Dolinski K,  
12 Dwight SS, Eppig JT, Harris MA, Hill DP, Issel-Tarver L, Kasarskis A, Lewis S, Matese  
13 JC, Richardson JE, Ringwald M, Rubin GM & Sherlock G (2000) Gene ontology: tool for  
14 the unification of biology. The Gene Ontology Consortium. *Nat. Genet.* **25**: 25–9
- 15 Bailey TL & Machanick P (2012) Inferring direct DNA binding from ChIP-seq. *Nucleic Acids*  
16 *Res.* **40**: e128
- 17 Battaglia G, Cannella M, Riozzi B, Orobello S, Maat-Schieman ML, Aronica E, Busceti CL,  
18 Ciarmiello A, Alberti S, Amico E, Sassone J, Sipione S, Bruno V, Frati L, Nicoletti F &  
19 Squitieri F (2011) Early defect of transforming growth factor  $\beta$ 1 formation in Huntington's  
20 disease. *J. Cell. Mol. Med.* **15**: 555–71
- 21 Becanovic K, Pouladi MA, Lim RS, Kuhn A, Pavlidis P, Luthi-Carter R, Hayden MR & Leavitt  
22 BR (2010) Transcriptional changes in Huntington disease identified using genome-wide  
23 expression profiling and cross-platform analysis. *Hum. Mol. Genet.* **19**: 1438–52
- 24 Benn CL, Sun T & Sadri-Vakili G Huntingtin Modulates Transcription, Occupies Gene  
25 Promoters In Vivo, and Binds Directly to DNA in a Polyglutamine-Dependent Manner. **28**:
- 26 Bonneau R, Reiss DJ, Shannon P, Facciotti M, Hood L, Baliga NS & Thorsson V (2006) The  
27 Inferelator: an algorithm for learning parsimonious regulatory networks from systems-  
28 biology data sets de novo. *Genome Biol.* **7**: R36
- 29 Carty N, Berson N, Tillack K, Thiede C, Scholz D, Kottig K, Sedaghat Y, Gabrysiak C, Yohrling  
30 G, von der Kammer H, Ebnet A, Mack V, Munoz-Sanjuan I & Kwak S (2015)  
31 Characterization of HTT inclusion size, location, and timing in the zQ175 mouse model of  
32 Huntington's disease: an in vivo high-content imaging study. *PLoS One* **10**: e0123527
- 33 Deng YP, Wong T, Bricker-Anthony C, Deng B & Reiner A (2013) Loss of corticostriatal and  
34 thalamostriatal synaptic terminals precedes striatal projection neuron pathology in  
35 heterozygous Q140 Huntington's disease mice. *Neurobiol. Dis.* **60**: 89–107
- 36 Dickey AS, Pineda V V, Tsunemi T, Liu PP, Miranda HC, Gilmore-Hall SK, Lomas N, Sampat  
37 KR, Buttgereit A, Torres M-JM, Flores AL, Arreola M, Arbez N, Akimov SS, Gaasterland  
38 T, Lazarowski ER, Ross CA, Yeo GW, Sopher BL, Magnuson GK, et al (2015) PPAR- $\delta$  is  
39 repressed in Huntington's disease, is required for normal neuronal function and can be  
40 targeted therapeutically. *Nat. Med.* **22**: 37–45
- 41 Dougherty JD, Schmidt EF, Nakajima M & Heintz N (2010) Analytical approaches to RNA  
42 profiling data for the identification of genes enriched in specific cells. *Nucleic Acids Res.*  
43 **38**: 4218–30
- 44 Doyle JP, Dougherty JD, Heiman M, Schmidt EF, Stevens TR, Ma G, Bupp S, Shrestha P, Shah  
45 RD, Doughty ML, Gong S, Greengard P & Heintz N (2008) Application of a translational  
46 profiling approach for the comparative analysis of CNS cell types. *Cell* **135**: 749–62

- 1 Durrenberger PF, Fernando FS, Kashefi SN, Bonnert TP, Seilhean D, Nait-Oumesmar B,  
2 Schmitt A, Gebicke-Haerter PJ, Falkai P, Grünblatt E, Palkovits M, Arzberger T,  
3 Kretschmar H, Dexter DT & Reynolds R (2015) Common mechanisms in  
4 neurodegeneration and neuroinflammation: a BrainNet Europe gene expression microarray  
5 study. *J. Neural Transm.* **122**: 1055–68
- 6 Fossale E, Seong IS, Coser KR, Shioda T, Kohane IS, Wheeler VC, Gusella JF, MacDonald ME  
7 & Lee J-M (2011) Differential effects of the Huntington’s disease CAG mutation in  
8 striatum and cerebellum are quantitative not qualitative. *Hum. Mol. Genet.* **20**: 4258–67
- 9 Friedman J, Hastie T & Tibshirani R (2010) Regularization paths for generalized linear models  
10 via coordinate descent. *J. Stat. Softw.*
- 11 Friedman N, Linial M, Nachman I & Pe’er D (2000) Using Bayesian networks to analyze  
12 expression data. *J. Comput. Biol.* **7**: 601–20
- 13 Gerstein MB, Kundaje A, Hariharan M, Landt SG, Yan K-K, Cheng C, Mu XJ, Khurana E,  
14 Rozowsky J, Alexander R, Min R, Alves P, Abyzov A, Addleman N, Bhardwaj N, Boyle  
15 AP, Cayting P, Charos A, Chen DZ, Cheng Y, et al (2012) Architecture of the human  
16 regulatory network derived from ENCODE data. *Nature* **489**: 91–100
- 17 Giles P, Elliston L, Higgs G V, Brooks SP, Dunnett SB & Jones L (2012) Longitudinal analysis  
18 of gene expression and behaviour in the HdhQ150 mouse model of Huntington’s disease.  
19 *Brain Res. Bull.* **88**: 199–209
- 20 Grant CE, Bailey TL & Noble WS (2011) FIMO: scanning for occurrences of a given motif.  
21 *Bioinformatics* **27**: 1017–8
- 22 Haury A-C, Mordélet F, Vera-Licona P & Vert J-P (2012) TIGRESS: Trustful Inference of Gene  
23 REgulation using Stability Selection. *BMC Syst. Biol.* **6**: 145
- 24 Hodges A, Strand AD, Aragaki AK, Kuhn A, Sengstag T, Hughes G, Elliston LA, Hartog C,  
25 Goldstein DR, Thu D, Hollingsworth ZR, Collin F, Synek B, Holmans PA, Young AB,  
26 Wexler NS, Delorenzi M, Kooperberg C, Augood SJ, Faull RLM, et al (2006) Regional and  
27 cellular gene expression changes in human Huntington’s disease brain. *Hum. Mol. Genet.*  
28 **15**: 965–77
- 29 Hsiao H-Y, Chen Y-C, Chen H-M, Tu P-H & Chern Y (2013a) A critical role of astrocyte-  
30 mediated nuclear factor- $\kappa$ B-dependent inflammation in Huntington’s disease. *Hum. Mol.*  
31 *Genet.* **22**: 1826–42
- 32 Hsiao H-Y, Chen Y-C, Chen H-M, Tu P-H & Chern Y (2013b) A critical role of astrocyte-  
33 mediated nuclear factor- $\kappa$ B-dependent inflammation in Huntington’s disease. *Hum. Mol.*  
34 *Genet.* **22**: 1826–42
- 35 Hume MA, Barrera LA, Gisselbrecht SS & Bulyk ML (2015) UniPROBE, update 2015: new  
36 tools and content for the online database of protein-binding microarray data on protein-  
37 DNA interactions. *Nucleic Acids Res.* **43**: D117-22
- 38 Huntingtin interacts with REST/NRSF to modulate the transcription of NRSE-controlled  
39 neuronal genes (2003) *Nat. ...*
- 40 Huynh-Thu VA, Irrthum A, Wehenkel L & Geurts P (2010) Inferring regulatory networks from  
41 expression data using tree-based methods. *PLoS One* **5**:
- 42 Jolma A, Yan J, Whittington T, Toivonen J, Nitta KR, Rastas P, Morgunova E, Enge M, Taipale  
43 M, Wei G, Palin K, Vaquerizas JM, Vincentelli R, Luscombe NM, Hughes TR, Lemaire P,  
44 Ukkonen E, Kivioja T & Taipale J (2013) DNA-binding specificities of human transcription  
45 factors. *Cell* **152**: 327–39
- 46 Kandasamy M, Reilmann R, Winkler J, Bogdahn U & Aigner L (2011) Transforming Growth

- 1 Factor-Beta Signaling in the Neural Stem Cell Niche: A Therapeutic Target for  
2 Huntington's Disease. *Neurol. Res. Int.* **2011**: 124256
- 3 Kuhn A, Goldstein DR, Hodges A, Strand AD, Sengstag T, Kooperberg C, Becanovic K, Pouladi  
4 MA, Sathasivam K, Cha J-HJ, Hannan AJ, Hayden MR, Leavitt BR, Dunnett SB, Ferrante  
5 RJ, Albin R, Shelbourne P, Delorenzi M, Augood SJ, Faull RLM, et al (2007) Mutant  
6 huntingtin's effects on striatal gene expression in mice recapitulate changes observed in  
7 human Huntington's disease brain and do not differ with mutant huntingtin length or wild-  
8 type huntingtin dosage. *Hum. Mol. Genet.* **16**: 1845–61
- 9 Lachmann A, Xu H, Krishnan J, Berger SI, Mazloom AR & Ma'ayan A (2010) ChEA:  
10 transcription factor regulation inferred from integrating genome-wide ChIP-X experiments.  
11 *Bioinformatics* **26**: 2438–44
- 12 Langfelder P, Cantle JP, Chatzopoulou D, Wang N, Gao F, Al-Ramahi I, Lu X-H, Ramos EM,  
13 El-Zein K, Zhao Y, Deverasetty S, Tebbe A, Schaab C, Lavery DJ, Howland D, Kwak S,  
14 Botas J, Aaronson JS, Rosinski J, Coppola G, et al (2016) Integrated genomics and  
15 proteomics define huntingtin CAG length-dependent networks in mice. *Nat. Neurosci.* **19**:  
16 623–33
- 17 Langmead B & Salzberg SL (2012) Fast gapped-read alignment with Bowtie 2. *Nat. Methods* **9**:  
18 357–9
- 19 Li L, Liu H, Dong P, Li D, Legant WR, Grimm JB, Lavis LD, Betzig E, Tjian R & Liu Z (2016)  
20 Real-time imaging of Huntingtin aggregates diverting target search and gene transcription.  
21 *Elife* **5**: 1–29
- 22 Luthi-Carter R, Strand A, Peters NL, Solano SM, Hollingsworth ZR, Menon AS, Frey AS,  
23 Spektor BS, Penney EB, Schilling G, Ross CA, Borchelt DR, Tapscott SJ, Young AB, Cha  
24 JH & Olson JM (2000) Decreased expression of striatal signaling genes in a mouse model  
25 of Huntington's disease. *Hum. Mol. Genet.* **9**: 1259–71
- 26 MacDonald M, Ambrose C & Duyao M (1993) A novel gene containing a trinucleotide repeat  
27 that is expanded and unstable on Huntington's disease chromosomes. *Cell*
- 28 Marbach D, Costello JC, Küffner R, Vega NM, Prill RJ, Camacho DM, Allison KR, Kellis M,  
29 Collins JJ & Stolovitzky G (2012) Wisdom of crowds for robust gene network inference.  
30 *Nat. Methods* **9**: 796–804
- 31 Margolin AA, Nemenman I, Basso K, Wiggins C, Stolovitzky G, Dalla Favera R & Califano A  
32 (2006) ARACNE: an algorithm for the reconstruction of gene regulatory networks in a  
33 mammalian cellular context. *BMC Bioinformatics* **7 Suppl 1**: S7
- 34 Mathelier A, Zhao X, Zhang AW, Parcy F, Worsley-Hunt R, Arenillas DJ, Buchman S, Chen C,  
35 Chou A, Ienasescu H, Lim J, Shyr C, Tan G, Zhou M, Lenhard B, Sandelin A &  
36 Wasserman WW (2014) JASPAR 2014: an extensively expanded and updated open-access  
37 database of transcription factor binding profiles. *Nucleic Acids Res.* **42**: D142-7
- 38 Matys V, Kel-Margoulis O V, Fricke E, Liebich I, Land S, Barre-Dirrie A, Reuter I, Chekmenev  
39 D, Krull M, Hornischer K, Voss N, Stegmaier P, Lewicki-Potapov B, Saxel H, Kel AE &  
40 Wingender E (2006) TRANSFAC and its module TRANSCOMP: transcriptional gene  
41 regulation in eukaryotes. *Nucleic Acids Res.* **34**: D108-10
- 42 Morton AJ, Wood NI, Hastings MH, Hurelbrink C, Barker RA & Maywood ES (2005)  
43 Disintegration of the sleep-wake cycle and circadian timing in Huntington's disease. *J.*  
44 *Neurosci.* **25**: 157–63
- 45 Neph S, Vierstra J, Stergachis AB, Reynolds AP, Haugen E, Vernot B, Thurman RE, John S,  
46 Sandstrom R, Johnson AK, Maurano MT, Humbert R, Rynes E, Wang H, Vong S, Lee K,



- 1 Bates D, Diegel M, Roach V, Dunn D, et al (2012) An expansive human regulatory lexicon  
2 encoded in transcription factor footprints. *Nature* **489**: 83–90
- 3 Niewiadomska-Cimicka A, Krzyżosiak A, Ye T, Podleśny-Drabiniok A, Dembélé D, Dollé P &  
4 Krężel W (2016) Genome-wide Analysis of RAR $\beta$  Transcriptional Targets in Mouse  
5 Striatum Links Retinoic Acid Signaling with Huntington’s Disease and Other  
6 Neurodegenerative Disorders. *Mol. Neurobiol.*
- 7 Orsi GA, Kasinathan S, Zentner GE, Henikoff S & Ahmad K (2015) Mapping regulatory factors  
8 by immunoprecipitation from native chromatin. *Curr. Protoc. Mol. Biol.* **110**: 21.31.1–25
- 9 Parker JA, Vazquez-Manrique RP, Tourette C, Farina F, Offner N, Mukhopadhyay A, Orfila A-  
10 M, Darbois A, Menet S, Tissenbaum HA & Neri C (2012) Integration of  $\beta$ -catenin, sirtuin,  
11 and FOXO signaling protects from mutant huntingtin toxicity. *J. Neurosci.* **32**: 12630–40
- 12 Piper J, Elze MC, Cauchy P, Cockerill PN, Bonifer C & Ott S (2013) Wellington: a novel  
13 method for the accurate identification of digital genomic footprints from DNase-seq data.  
14 *Nucleic Acids Res.* **41**: e201
- 15 Plaisier CL, O’Brien S, Bernard B, Reynolds S, Simon Z, Toledo CM, Ding Y, Reiss DJ,  
16 Paddison PJ & Baliga NS (2016) Causal Mechanistic Regulatory Network for Glioblastoma  
17 Deciphered Using Systems Genetics Network Analysis. *Cell Syst.*
- 18 Reiss DJ, Plaisier CL, Wu W-J & Baliga NS (2015) cMonkey2: Automated, systematic,  
19 integrated detection of co-regulated gene modules for any organism. *Nucleic Acids Res.* **43**:  
20 e87
- 21 Ring KL, An MC, Zhang N, O’Brien RN, Ramos EM, Gao F, Atwood R, Bailus BJ, Melov S,  
22 Mooney SD, Coppola G & Ellerby LM (2015) Genomic Analysis Reveals Disruption of  
23 Striatal Neuronal Development and Therapeutic Targets in Human Huntington’s Disease  
24 Neural Stem Cells. *Stem cell reports* **5**: 1023–38
- 25 Robinson MD, McCarthy DJ & Smyth GK (2010) edgeR: a Bioconductor package for  
26 differential expression analysis of digital gene expression data. *Bioinformatics* **26**: 139–40
- 27 Rothe T, Deliano M, Wójtowicz AM, Dvorzhak A, Harnack D, Paul S, Vagner T, Melnick I,  
28 Stark H & Grantyn R (2015) Pathological gamma oscillations, impaired dopamine release,  
29 synapse loss and reduced dynamic range of unitary glutamatergic synaptic transmission in  
30 the striatum of hypokinetic Q175 Huntington mice. *Neuroscience* **311**: 519–38
- 31 Seong IS, Woda JM, Song J-J, Lloret A, Abeyrathne PD, Woo CJ, Gregory G, Lee J-M, Wheeler  
32 VC, Walz T, Kingston RE, Gusella JF, Conlon RA & MacDonald ME (2010) Huntingtin  
33 facilitates polycomb repressive complex 2. *Hum. Mol. Genet.* **19**: 573–83
- 34 Seredenina T & Luthi-Carter R (2012) What have we learned from gene expression profiles in  
35 Huntington’s disease? *Neurobiol. Dis.* **45**: 83–98
- 36 Shirasaki DI, Greiner ER, Al-Ramahi I, Gray M, Boontheung P, Geschwind DH, Botas J,  
37 Coppola G, Horvath S, Loo JA & Yang XW (2012) Network organization of the huntingtin  
38 proteomic interactome in mammalian brain. *Neuron* **75**: 41–57
- 39 Singhrao SK, Neal JW, Morgan BP & Gasque P (1999) Increased complement biosynthesis by  
40 microglia and complement activation on neurons in Huntington’s disease. *Exp. Neurol.* **159**:  
41 362–76
- 42 Skene PJ, Illingworth RS, Webb S, Kerr ARW, James KD, Turner DJ, Andrews R & Bird AP  
43 (2010) Neuronal MeCP2 is expressed at near histone-octamer levels and globally alters the  
44 chromatin state. *Mol. Cell* **37**: 457–68
- 45 Tabrizi SJ, Scahill RI, Owen G, Durr A, Leavitt BR, Roos RA, Borowsky B, Landwehrmeyer B,  
46 Frost C, Johnson H, Craufurd D, Reilmann R, Stout JC, Langbehn DR & TRACK-HD



- 1 Investigators (2013) Predictors of phenotypic progression and disease onset in premanifest  
2 and early-stage Huntington's disease in the TRACK-HD study: analysis of 36-month  
3 observational data. *Lancet. Neurol.* **12**: 637–49
- 4 Tang B, Becanovic K, Desplats PA, Spencer B, Hill AM, Connolly C, Masliah E, Leavitt BR &  
5 Thomas EA (2012) Forkhead box protein p1 is a transcriptional repressor of immune  
6 signaling in the CNS: implications for transcriptional dysregulation in Huntington disease.  
7 *Hum. Mol. Genet.* **21**: 3097–111
- 8 Thomas EA, Coppola G & Desplats PA The HDAC inhibitor 4b ameliorates the disease  
9 phenotype and transcriptional abnormalities in Huntington's disease transgenic mice. **105**:
- 10 Tibshirani R (1996) Regression shrinkage and selection via the lasso. *J. R. Stat. Soc. Ser. B* ( ...
- 11 Valenza M, Rigamonti D, Goffredo D, Zuccato C, Fenu S, Jamot L, Strand A, Tarditi A,  
12 Woodman B, Racchi M, Mariotti C, Di Donato S, Corsini A, Bates G, Pruss R, Olson JM,  
13 Sipione S, Tartari M & Cattaneo E (2005) Dysfunction of the cholesterol biosynthetic  
14 pathway in Huntington's disease. *J. Neurosci.* **25**: 9932–9
- 15 Vonsattel JP, Myers RH, Stevens TJ, Ferrante RJ, Bird ED & Richardson EP (1985)  
16 Neuropathological classification of Huntington's disease. *J. Neuropathol. Exp. Neurol.* **44**:  
17 559–77
- 18 Welch RP, Lee C, Imbriano PM, Patil S, Weymouth TE, Smith RA, Scott LJ & Sartor MA  
19 (2014) ChIP-Enrich: gene set enrichment testing for ChIP-seq data. *Nucleic Acids Res.* **42**:  
20 e105
- 21 Wheeler VC, Auerbach W, White JK, Srinidhi J, Auerbach A, Ryan A, Duyao MP, Vrbanc V,  
22 Weaver M, Gusella JF, Joyner AL & MacDonald ME (1999) Length-dependent gametic  
23 CAG repeat instability in the Huntington's disease knock-in mouse. *Hum. Mol. Genet.* **8**:  
24 115–22
- 25 Wheeler VC, White JK, Gutekunst CA, Vrbanc V, Weaver M, Li XJ, Li SH, Yi H, Vonsattel  
26 JP, Gusella JF, Hersch S, Auerbach W, Joyner AL & MacDonald ME (2000) Long  
27 glutamine tracts cause nuclear localization of a novel form of huntingtin in medium spiny  
28 striatal neurons in HdhQ92 and HdhQ111 knock-in mice. *Hum. Mol. Genet.* **9**: 503–13
- 29 Wingender E, Schoeps T & Dönitz J (2013) TFClass: an expandable hierarchical classification of  
30 human transcription factors. *Nucleic Acids Res.* **41**: D165–70
- 31 Yue F, Cheng Y, Breschi A, Vierstra J, Wu W, Ryba T, Sandstrom R, Ma Z, Davis C, Pope BD,  
32 Shen Y, Pervouchine DD, Djebali S, Thurman RE, Kaul R, Rynes E, Kirilusha A, Marinov  
33 GK, Williams BA, Trout D, et al (2014) A comparative encyclopedia of DNA elements in  
34 the mouse genome. *Nature* **515**: 355–64
- 35 Zhang Y, Chen K, Sloan SA, Bennett ML, Scholze AR, O'Keefe S, Phatnani HP, Guarnieri P,  
36 Caneda C, Ruderisch N, Deng S, Liddelow SA, Zhang C, Daneman R, Maniatis T, Barres  
37 BA & Wu JQ (2014) An RNA-Sequencing Transcriptome and Splicing Database of Glia,  
38 Neurons, and Vascular Cells of the Cerebral Cortex. *J. Neurosci.* **34**: 11929–47
- 39 Zhang Y, Liu T, Meyer CA, Eeckhoutte J, Johnson DS, Bernstein BE, Nusbaum C, Myers RM,  
40 Brown M, Li W & Liu XS (2008) Model-based analysis of ChIP-Seq (MACS). *Genome*  
41 *Biol.* **9**: R137
- 42 Zuccato C, Belyaev N, Conforti P, Ooi L, Tartari M, Papadimou E, MacDonald M, Fossale E,  
43 Zeitlin S, Buckley N & Cattaneo E (2007) Widespread disruption of repressor element-1  
44 silencing transcription factor/neuron-restrictive silencer factor occupancy at its target genes  
45 in Huntington's disease. *J. Neurosci.* **27**: 6972–83
- 46 Zuccato C, Tartari M, Crotti A, Goffredo D, Valenza M, Conti L, Cataudella T, Leavitt BR,

1        Hayden MR, Timmusk T, Rigamonti D & Cattaneo E (2003) Huntingtin interacts with  
2        REST/NRSF to modulate the transcription of NRSE-controlled neuronal genes. *Nat. Genet.*  
3        **35**: 76–83  
4
